# Supplementary material for: CD31 signaling promotes the detachment at the uropod of extravasating neutrophils allowing their migration to sites of inflammation
Source: eLife journal article supplement (doi:10.7554/elife.84752), 2023-08-07
Supplement: fig3-figsupp1-data2 [file elife-84752-fig3-figsupp1-data2-v2.pdf]

CD31 Intracellular →  
Irrelevant bands →

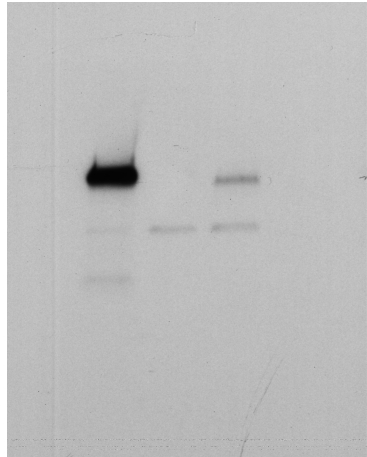

WT  
CD31KO  
CD31 13-14KO

CD31 Extracellular →  
Irrelevant bands →

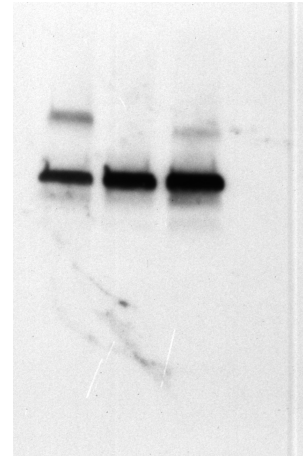

WT  
CD31KO  
CD31 13-14KO

Irrelevant bands →  
GAPDH →

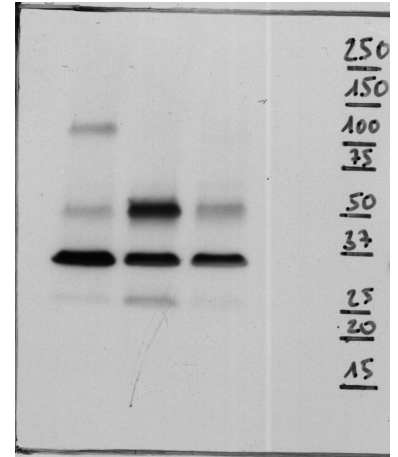

WT  
CD31KO  
CD31 13-14KO
