# Supplementary material for: CD31 signaling promotes the detachment at the uropod of extravasating neutrophils allowing their migration to sites of inflammation
Source: eLife. 2023 Aug 7;12:e84752. doi: 10.7554/eLife.84752 (PMC10431918; doi:10.7554/eLife.84752)
Supplement: Figure 1—source data 1. [file elife-84752-fig1-data1.xlsx]

## Sheet: Figure 1A
	Quantification of total number of neutrophils in WT and Pecam1-/- mice after IL-1b challenging
	Time [hours]	WT			Pecam1-/-
	0	0	0	0	0	0	0	0
	1	28875	29645	47075	2673.15	10713.9	2886.15	99502.9
	2	160388	119035	139195	743320	477067	285427	189442
	3	285075	463631	620436	593642	330107	485789	383688
	4	2864100	2069465	2483250	558656	91952.1	320165	802233
