# Supplementary material for: CD31 signaling promotes the detachment at the uropod of extravasating neutrophils allowing their migration to sites of inflammation
Source: eLife. 2023 Aug 7;12:e84752. doi: 10.7554/eLife.84752 (PMC10431918; doi:10.7554/eLife.84752)
Supplement: Figure 1—source data 2. [file elife-84752-fig1-data2.xlsx]

## Sheet: Figure 1B
	Fraction of neutrophils in the peropheral blood of WT and Pecam1-/- mice after IL-1b challenging
	Time [hours]	WT				Pecam1-/-
	0	22.2	26.2	28.6	30.6	32.2	26.2	28.6	30.6
	1	58.7	60	55.2	63.2	49.7	44.2	54.8	47.6
	2	65.1	75.7	69.6	69.5	58.9	68.1	54.5	60
	3	75.9	76	74.6	69.7	63	72	67
	4	67.3	70.7	76	73.4	64	75.5	66
