# Supplementary material for: CD31 signaling promotes the detachment at the uropod of extravasating neutrophils allowing their migration to sites of inflammation
Source: eLife. 2023 Aug 7;12:e84752. doi: 10.7554/eLife.84752 (PMC10431918; doi:10.7554/eLife.84752)
Supplement: Figure 1—source data 3. [file elife-84752-fig1-data3.xlsx]

## Sheet: Figure 1C
	Quantification of inflammatory cytokines in the plasma or peritoneal fluid of WT and Pecam1-/- mice 4 hours after IL-1b challenging
	Cytokine (ng/ml)	Source	Genotype
			WT			Pecam1-/-
	SDF-1	Plasma	903.7	2080.33	655.55	1230.75	866.88	943.39
	P-select		7250.62	4947.48	6211.14	6194.41	4360.64	7401.53
	CXCL1		292.51	480.67	145.16	540.22	398.91	421.59
	Pentraxin		7195.28	4194.07	7712.72	4343.62	6887.92	8498.2
	SDF-1	Peritoneal wash	636.23	536.87	443.39	973.55	655.55	403.7
	P-select		80.92	117.02	80.92	487.25	138.56	129.05
	CXCL1		1575.78	1672.39	1309.71	1365.64	1105.65	1872.87
	Pentraxin		0	0	0	0	0	0
