# Supplementary material for: CD31 signaling promotes the detachment at the uropod of extravasating neutrophils allowing their migration to sites of inflammation
Source: eLife. 2023 Aug 7;12:e84752. doi: 10.7554/eLife.84752 (PMC10431918; doi:10.7554/eLife.84752)
Supplement: Figure 1—source data 4. [file elife-84752-fig1-data4.xlsx]

## Sheet: Figure 1E
	Spearman correlation between the distance of each neutrphil from the closest capillary venule and its CD31 phospho(p)-Tyrosine(Y)-713 level
	pY713 (MFI)	Distance from vessel (µm)		Spearman r	pY713 (MFI) vs. Distance from vessel
	53.46	158.67		r	-0.6143
	40	153.51		95% confidence interval	-0,7067 to -0,5013
	132.37	32.23
	90.27	75.14		P value
	19.96	96.77		P (two-tailed)	<0,0001
	58.68	30.97		P value summary	****
	52.54	50.99		Exact or approximate P value?	Approximate
	30.74	121.26		Significant? (alpha = 0.05)	Yes
	15.66	178.02
	68.18	240.62		Number of XY Pairs	153
	25.09	221.88
	87.81	179.97
	47.77	153.51
	23.6	99.5
	89.53	38.72
	82.96	59.43
	54.16	5.8
	17.22	48.44
	34	100.96
	15.79	134.16
	60.23	16.12
	107.63	26.13
	18.09	179.96
	21.02	252.24
	16.6	130.97
	25.61	105.18
	78.1	47.73
	70.78	64.55
	99.98	7.09
	18.05	159.99
	16.95	225.8
	60.34	148.36
	34.81	150.94
	30.29	227.16
	21.5	59.51
	40.18	21.29
	25.34	136.12
	33.49	207.73
	19.08	160.32
	134.86	2.58
	26.82	218.11
	17.19	50.31
	16.2	150.32
	60.06	90.3
	130.68	14.13
	24.68	135.48
	46.24	9.12
	33.5	45.19
	17	125.2
	45.68	127.81
	61.7	230.92
	81.69	111.59
	14.38	139.97
	33.21	31.61
	84.35	4.52
	6	159.49
	24.94	94.82
	19.61	111.81
	97.27	13.56
	50.2	32.9
	21.83	122.56
	7	211.61
	39.94	23.87
	21.58	219.96
	94.65	4.56
	34.87	64.56
	83.52	80.63
	126.36	9.68
	64.58	289.01
	14.39	62.62
	22.79	146.44
	31.23	41.93
	77.18	7.12
	24.67	227.1
	13	247.73
	12.67	161.97
	58.88	83.23
	56.69	14.19
	55.66	95.48
	20.52	116.79
	34.43	198.71
	98.03	5.32
	27.48	247.76
	40.96	290.95
	44.61	297.4
	70.1	6.64
	20.64	56.12
	55.76	8.38
	40.83	33.54
	68.14	16.78
	24.6	232.48
	31.82	286.38
	41.12	23.94
	28.08	225.77
	40.54	189.08
	16.26	244.62
	66.42	71.06
	59.26	296.28
	116.04	9.03
	54.84	52.72
	19.51	232.9
	33.93	74.65
	58.83	8.68
	17.04	243.86
	50.04	194.71
	69.28	1.82
	114.3	6.12
	75.74	3.65
	130.22	6.39
	23.15	289.89
	57.61	8.38
	19.92	232.9
	75.69	4.08
	50.51	16.78
	54.53	6.35
	32.72	67.87
	37.72	100.2
	47.2	41.29
	19.29	87.11
	9	134.16
	14.04	123.84
	59.97	26.88
	38	29.88
	125.73	10.32
	114.33	6.98
	95.95	10.08
	61.77	19.45
	97.09	8.41
	60.95	93.58
	38.03	47.62
	32.38	23.65
	18.6	100.92
	17.57	260.29
	13.14	272.56
	10.46	249.53
	51.27	4.65
	13.56	147.04
	14.11	105.81
	118.46	4.52
	61	205.77
	64.49	3.47
	44.66	10.08
	28.1	185.76
	55.34	3.23
	20.4	131.62
	44.53	4.65
	13.51	159.98
	21.31	124.33
	98.6	52.25
	11.98	207.69
	18.74	145.79
	10.62	147.1
	12	198.02
