# Supplementary material for: CD31 signaling promotes the detachment at the uropod of extravasating neutrophils allowing their migration to sites of inflammation
Source: eLife. 2023 Aug 7;12:e84752. doi: 10.7554/eLife.84752 (PMC10431918; doi:10.7554/eLife.84752)
Supplement: Figure 1—source data 5. [file elife-84752-fig1-data5.xlsx]

## Sheet: Figure 1F
	Distance (µm) of neutrophils from the closest capillary venule in the omentum of WT and Pecam1-/- mice upon IL-1b challenge (n=3/group)
	Distance from the vessels (µm)
	Pecam1-/-	WT
	10.97	158.67
	27.61	153.51
	4.65	32.23
	9.59	75.14
	5.2	96.77
	4.91	30.97
	1.94	50.99
	7.85	121.26
	6.58	178.02
	8.21	240.62
	3.23	221.88
	2.66	179.97
	2.66	153.51
	3.87	99.5
	2.59	38.72
	0.86	59.43
	1.07	5.8
	1.08	48.44
	1.29	100.96
	1.95	134.16
	1.51	16.12
	1.72	26.13
	3.88	179.96
	1.07	252.24
	12.62	130.97
	58.41	105.18
	12.54	47.73
	8	64.55
	1.52	7.09
	2.8	159.99
	1.08	225.8
	1.5	148.36
	1.57	150.94
	3.01	227.16
	1.95	59.51
	0.65	21.29
	3.01	136.12
	2.15	207.73
	3.01	160.32
	1.16	2.58
	1.1	218.11
	3.5	50.31
	2.58	150.32
	19.5	90.3
	2.15	14.13
	2.37	135.48
	1.51	9.12
	2.32	45.19
	2.13	125.2
	8.73	127.81
	1.72	230.92
	0.61	111.59
	4.35	139.97
	0.96	31.61
	1.29	4.52
	1.72	159.49
	2.16	94.82
	7.97	111.81
	4.35	13.56
	4.09	32.9
	1.5	122.56
	11.41	211.61
	2.12	23.87
	1.77	219.96
	26.05	4.56
	4.56	64.56
	3.92	80.63
	20.55	9.68
	23.91	289.01
	14.41	62.62
	2.4	146.44
	36.77	41.93
	33.23	7.12
	44.63	227.1
	4.17	247.73
	3.47	161.97
	4.52	83.23
	4.96	14.19
	4.6	95.48
	27.31	116.79
	42.32	198.71
	2.16	5.32
	2.58	247.76
	2.4	290.95
	19.73	297.4
	8.65	6.64
	6.88	56.12
	1.5	8.38
	5.39	33.54
		16.78
		232.48
		286.38
		23.94
		225.77
		189.08
		244.62
		71.06
		296.28
		9.03
		52.72
		232.9
		74.65
		8.68
		243.86
		194.71
		1.82
		6.12
		3.65
		6.39
		289.89
		8.38
		232.9
		4.08
		16.78
		6.35
		67.87
		100.2
		41.29
		87.11
		134.16
		123.84
		26.88
		29.88
		10.32
		6.98
		10.08
		19.45
		8.41
		93.58
		47.62
		23.65
		100.92
		260.29
		272.56
		249.53
		4.65
		147.04
		105.81
		4.52
		205.77
		3.47
		10.08
		185.76
		3.23
		131.62
		4.65
		159.98
		124.33
		52.25
		207.69
		145.79
		147.1
		198.02
