# Supplementary material for: CD31 signaling promotes the detachment at the uropod of extravasating neutrophils allowing their migration to sites of inflammation
Source: eLife. 2023 Aug 7;12:e84752. doi: 10.7554/eLife.84752 (PMC10431918; doi:10.7554/eLife.84752)
Supplement: Figure 1—source data 6. [file elife-84752-fig1-data6.xlsx]

## Sheet: Figure 1H
	Fraction of neutrophils attached (<5µm) or released (>5µm) from the closest capillary venule in the omentum of WT and Pecam1-/- mice upon IL-1b challenge (n=3/group)
		Wt	Pecam1-/-
	Released	82.3529	19.1011
	Attached	17.6471	80.8989
