# Supplementary material for: CD31 signaling promotes the detachment at the uropod of extravasating neutrophils allowing their migration to sites of inflammation
Source: eLife. 2023 Aug 7;12:e84752. doi: 10.7554/eLife.84752 (PMC10431918; doi:10.7554/eLife.84752)
Supplement: Figure 2—figure supplement 1—source data 2. [file elife-84752-fig2-figsupp1-data2.xlsx]

## Sheet: Figure 2-figure supplement 2
		KEGG functional annotation pathways enriched in human neutrophil CD31 interactome under fMLP-activated conditions
		KEGG pathway	Log2PV
		Pathogenic E. coli infection	2.8365
		Salmonella infection	3.52284
		Bacterial invasion of epithelial cells	5.87832
		Endocytosis	6.50635
		Shigellosis	6.87832
		Fc gamma R-mediated phagocytosys	16.6989
		Regulation of actin cytoskeleton	21.6685
		Systemic lupus erythematosus	2.05889
		Focal adhesion	3.05889
		Viral carcinogenesis	3.05889
		Adherems junctions	4.05889
		Amoebiasis	14.2311
		Leukocyte transendothelial migration	19.2535
		Regulation of actin cytoskeleton	21.6685
