# Supplementary material for: CD31 signaling promotes the detachment at the uropod of extravasating neutrophils allowing their migration to sites of inflammation
Source: eLife. 2023 Aug 7;12:e84752. doi: 10.7554/eLife.84752 (PMC10431918; doi:10.7554/eLife.84752)
Supplement: Figure 2—source data 1. [file elife-84752-fig2-data1.xlsx]

## Sheet: Fig. 2C
	Proitein pulled down with CD31 and identified by mass spectrometry
	Protein name	Log2FC
	LDHA	-6.218
	PGLYRP1	-6.117
	GANAB	-5.865
	ERO1L	-5.839
	ETHE1	-5.787
	CA2	-5.787
	NT5C2	-5.619
	WDFY1	-5.572
	RHOG	-5.544
	GNB2	-5.514
	RNPEP	-5.488
	RHOT1	-5.394
	FAM175B	-5.36
	GSTO1	-5.36
	TRAPPC1	-5.278
	PRG2	-5.223
	PYCARD	-5.197
	SCCPDH	-5.176
	CSTA	-5.171
	FPGT	-5.138
	SPTAN1	-5.119
	CPNE3	-5.084
	RBBP7	-5.073
	SMARCD2	-5.058
	KPNA1	-5.043
	TNPO1	-5.022
	PSMD4	-5.011
	RHOA	-4.875
	TUBG1	-4.856
	RAB10	-4.793
	SAR1B	-4.789
	DCK	-4.623
	ABHD12	-4.622
	SELENBP1	-4.614
	COTL1	-4.601
	RPS16	-4.587
	COASY	-4.583
	CDC42	-4.546
	HNRNPL	-4.515
	RPL12	-4.512
	BUB3	-4.453
	SSBP1	-4.396
	XPNPEP1	-4.331
	HIST1H4A	-2.318
	TRAPPC8	-2.217
	ITGB2	-2.184
	MPO	-1.891
	HP	-1.735
	LCN2	-1.647
	ITGAM	-1.633
	ANXA4	-1.342
	VAT1	-1.262
	TSTA3	-1.206
	TRAPPC11	-1.204
	SNX27	-1.137
	WDR1	-1.132
	ARPC1B	-0.989
	PPP2CA	-0.927
	ARPC2	-0.855
	PPIA	-0.829
	FLOT1	-0.779
	ALB	-0.746
	VCL	-0.706
	RAB7L1	-0.675
	FKBP1A	-0.658
	CTSD	-0.654
	PIK3CD	-0.649
	CORO1A	-0.628
	CAT	-0.615
	LTF	-0.599
	SH3BGRL	-0.577
	ATG5	-0.569
	LYZ	-0.567
	CASP14	-0.558
	GBE1	-0.507
	ROCK2	-0.459
	CRISP3	-0.443
	RAC2	-0.42
	DUSP23	-0.358
	VASP	-0.352
	HSPA8	-0.348
	PRG3	-0.343
	CAMP	-0.269
	HMGB2	-0.267
	GAPDH	-0.261
	SERPINA1	-0.253
	PECAM1	-0.253
	RNASE3	-0.22
	PAFAH1B2	-0.206
	HIST1H1T	-0.206
	GPI	-0.202
	GLIPR2	-0.18
	LDHB	-0.129
	DIP2B	-0.127
	AHCY	-0.086
	TOR1AIP1	-0.049
	AP1S2	-0.035
	LTA4H	-0.02
	PSMA3	-0.014
	AZU1	-0.014
	NAPRT1	0.068
	CSTB	0.071
	PNP	0.086
	BPI	0.109
	MDH2	0.139
	PGAM1	0.145
	CAPN1	0.165
	AZGP1	0.167
	ARPC4	0.214
	SERPINB6	0.225
	TKT	0.233
	ALDOA	0.24
	CA1	0.26
	JUP	0.263
	DCD	0.294
	APMAP	0.325
	SERPINB12	0.331
	EPX	0.334
	SERPINB1	0.36
	TPI1	0.366
	ARHGDIA	0.393
	NDUFB9	0.445
	HIST1H1B	0.446
	CEACAM8	0.482
	PGK1	0.487
	PRSS1	0.492
	PPIB	0.5
	CD177	0.592
	ANXA2	0.645
	GLRX	0.648
	S100A8	0.653
	H2AFJ	0.681
	GGCT	0.712
	ANXA1	0.723
	MSN	0.879
	CLIC1	0.931
	CAP1	0.948
	ACTN4	0.96
	DSG1	1.036
	RNH1	1.04
	CTSG	1.105
	FABP5	1.146
	CHMP2A	1.197
	PFN1	1.388
	ARG1	1.411
	ACTN1	1.423
	LCP1	1.442
	HSPA5	1.447
	ARPC5	1.459
	BZW1	1.595
	GSN	1.63
	CEACAM1	1.696
	PRTN3	1.739
	LPCAT3	1.97
	PPP3CA	2.058
	VPS4A	4.239
	RAB37	4.328
	CHMP7	4.341
	PAFAH1B1	4.49
	EPB42	4.598
	DDX6	4.652
	RSU1	4.806
	PEBP1	4.814
	ANXA7	5.066
	INPP5D	5.092
	VDAC3	5.149
	DPM1	5.282
	MDH1	5.408
	BLVRB	5.827
	PPP3CB	5.83
	GLA	5.843
	PTPLAD1	6.05
	DSP	6.493
