# Supplementary material for: CD31 signaling promotes the detachment at the uropod of extravasating neutrophils allowing their migration to sites of inflammation
Source: eLife. 2023 Aug 7;12:e84752. doi: 10.7554/eLife.84752 (PMC10431918; doi:10.7554/eLife.84752)
Supplement: Figure 2—source data 2. [file elife-84752-fig2-data2.xlsx]

## Sheet: Fig. 2H
	Quantification of mean fluorescence intensities (MFI) of CD31 (clone WM59) and CD31 pY713 (clone EPR8079) along the cell axis
	Distance (µm)	CD31				pY713
	0	17.6	21.3	14.3622	11.0707	15.84	29.4	22.8	4.961
	0.2	17.5657	24.3765	14.6424	8.3858	15.84	29.4	22.8	4.961
	0.41	15.6947	32.6	14.8518	14.2	15.8722	28.3752	24.2412	17.6059
	0.61	21.7708	48.753	14.3424	10.6754	17.4278	33.702	25.7844	6.67482
	0.82	20.9881	60.0213	11.4765	9.83536	14.2387	42.2544	24.5412	11.9559
	1.02	23.2127	88.1034	12.8448	9.91768	18.0779	55.3812	30.6648	10
	1.23	38.0288	127.331	23.3037	14.2823	21.1138	80.487	30.9036	8.91994
	1.43	67.3692	160.766	44.9271	18.2354	29.8962	112.067	30.7716	13.3882
	1.64	112.7	163.477	71.7648	8.63304	55.8511	150.887	28.7904	14.6246
	1.84	164.522	162.939	107.844	16.7693	93.6967	186.518	44.9052	16.3384
	2.05	187.151	164.903	131.032	27.4093	149.169	198.328	70.2312	11.7449
	2.25	171.322	160.372	154.931	50.5342	192.855	197.617	115.093	29.4684
	2.46	145.37	163.629	189.99	113.238	200.512	190.656	179.767	51.7063
	2.66	124.193	175.256	198.223	165.219	163.599	171.283	198.95	109.5
	2.87	108.745	188.502	196.421	176.715	124.251	151.109	184.229	163.678
	3.07	95.7381	162.789	183.697	141.847	93.6698	122.846	164.574	165.556
	3.28	84.9557	135.336	134.282	100.539	77.6311	112.541	144.631	157.896
	3.48	89.9023	86.3172	79.3113	95.7293	71.1295	113.504	141.095	107.121
	3.69	95.1031	83.3413	47.2155	102.68	68.7922	98.8224	138.037	86.4169
	3.89	94.4853	81.859	47.2254	95.4	61.0414	77.7372	114.744	68.6624
	4.1	89.4285	75.3227	51.534	102.663	61.1786	57.4698	80.622	70.0551
	4.3	83.0299	72.6316	57.3771	86.0446	66.3313	49.3056	59.0376	49.742
	4.5	84.142	67.0748	68.6052	98.727	75.2857	48.2406	53.0472	50.9154
	4.71	84.7119	59.9321	68.8443	109.301	92.0983	49.6206	44.0856	42.9421
	4.91	84.2039	56.5341	55.8471	116.482	89.6186	48.741	44.4468	33.0129
	5.12	85.5634	56.7148	45.1626	117.602	61.501	43.9332	41.82	55.1878
	5.32	81.3684	57.8755	43.5432	103.207	45.9806	47.7798	35.3496	44.3668
	5.53	70.9428	60.5319	47.9781	96.6188	38.4851	51.3528	33.5016	24.7808
	5.73	69.9301	60.9096	53.8287	112.892	37.9638	52.6872	31.4928	28.6388
	5.94	74.4546	59.1249	51.0258	115.725	34.466	44.0442	27.4764	31.6201
	6.14	74.585	55.536	48.7542	115.972	37.0719	39.1842	29.4696	24.4916
	6.35	56.5866	51.684	43.3449	121.802	41.486	33.8874	34.6668	26.2525
	6.55	57.9634	51.4592	37.8072	132.261	43.337	36.4434	28.7148	23.1375
	6.76	62.6216	49.4034	43.1262	112.299	44.6159	43.4442	25.1652	20.6655
	6.96	51.2108	50.2276	53.5557	110.553	48.1756	38.6988	26.3148	28.9909
	7.17	44.7296	51.2307	52.5387	71.3035	37.7437	30.672	23.0148	19.7812
	7.37	42.9892	49.1279	60.7095	75.52	29.1841	31.6806	20.3916	30.6577
	7.58	44.6199	45.5625	62.9394	81.2023	28.8376	37.5	22.2636	28.2008
	7.78	45.5912	44.2104	64.5294	58.8023	25.1919	42.777	25.206	20.7588
	7.99	44.8292	44.4954	67.821	65.6212	27.3814	43.0596	28.0104	18.5054
	8.19	43.5316	43.9046	71.5989	75.8658	31.9862	39.2784	24.1968	16.0485
	8.4	38.5266	42.0153	85.2	73	32.5102	35.652	20.8368	11.9878
	8.6	40.9811	40.8244	84.7941	65.5388	31.543	30.8712	33.1824	16.1426
	8.8	46.5181	41.2724	78.5232	73.0165	32.2092	28.5084	36.9888	13.2159
	9.01	45.9999	40.584	75.9912	60.2188	25.8098	29.3454	38.4	16.8545
	9.21	47.0262	39.0632	73.8822	52.6423	24.6814	29.5758	28.164	22.9736
	9.42	47.2974	40.7375	68.7924	64.32	21.1567	31.3128	21.9924	20.2032
	9.62	42.6974	39.5877	62.8482	57.88	20.9956	31.4202	28.2936	18.6776
	9.83	46.3431	34.3557	60.9186	61.24	23.0668	33.3096	30.654	19.1626
	10.03	48.0939	33.2973	39.567	65.3907	26.6668	37.7334	26.7048	33.2079
	10.24	45.2069	35.7874	36.9171	68.8823	19.9048	36.8982	28.0716	32.1833
	10.44	53.2569	34.602	38.1174	76.4919	20.1814	36.3636	28.5936	26.1037
	10.65	49.4292	32.553	34.281	96.7835	18.0403	34.2822	26.9664	27.4881
	10.85	37.1946	33.6266	34.4955	89.52	16.7776	37.6164	26.8224	37.1441
	11.06	24.7231	34.1571	29.3712	89.4542	16.5413	43.8726	25.8648	25.5162
	11.26	22.8969	34.95	30.5535	86.0281	15.7406	41.25	26.8176	42.0108
	11.47	18.0634	35.4135	33.8694	79.1765	14.3759	34.4148	25.842	32.2304
	11.67	18.2008	38.5194	40.542	76.8707	14.099	29.8224	24.384	29.8441
	11.88	17.8438	42.696	44.8464	52.9554	13.7902	30.1458	22.9896	38.1847
	12.08	18.0393	45.1677	40.1118	55.047	14.8352	33.5148	22.8384	27.1048
	12.29	17.8953	42.254	45.6309	40.487	13.0379	37.2102	33.246	20.9941
	12.49	15.4166	29.6456	55.3278	40.4046	13.14	31.9332	27.5256	12.1988
	12.7	16.1512	21.4103	64.0497	37.3907	11.579	25.656	23.7648	17.6135
	12.9	17.2053	19.9444	58.7745	23.7365	14.0051	24.1644	23.5452	8.85771
	13.1	13.563	16.8071	52.8375	19.2893	14.443	26.4372	23.28	3.24718
	13.31	19.0281	18.6915	51.8358	9.91768	11.5684	23.985	18.3732	7.03459
	13.51	13.5766	17.1444	54.231	7.80928	13.6289	24.1938	20.9688	4.10788
	13.72	17.83	18.2442	54.3534	14.3154	14.7062	22.3794	22.5888	14.3741
	13.92	16.1512	17.9652	48.9861	10.7577	15.66	24.3534	31.764	7.59777
	14.13	17.2053	21.0674	52.6335	7.90812	14.0051	23.4558	23.0532	12.2383
	14.33	13.563	19.2558	53.4828	11.12	14.443	24.3804	28.4604	6.23829
	14.54	19.0281	19.0724	59.7333	11.5319	11.5684	23.5746	27.7656	2.72347
	14.74	13.5766	18.75	47.9616	7.90812	13.6289	15.66	27.7812	7.22206
	14.95	17.83	8.915	32.2851	11.12	14.7062	14.7062	27.522
	15.15	13.5766	6.78831	22.6167	11.5319	15.66	15.66	26.1456
	15.36	17.83	8.915	20.5998	11.12	14.7062		20.9172
