# Supplementary material for: CD31 signaling promotes the detachment at the uropod of extravasating neutrophils allowing their migration to sites of inflammation
Source: eLife. 2023 Aug 7;12:e84752. doi: 10.7554/eLife.84752 (PMC10431918; doi:10.7554/eLife.84752)
Supplement: Figure 2—source data 3. [file elife-84752-fig2-data3.xlsx]

## Sheet: Fig. 2I
	Quantification of mean fluorescence intensities (MFI) of CD31 (clone WM59) and SHIP-1 (clone P1C1) along the cell axis
	Distance (µm)	CD31						SHIP-1
	0	26.19	38.4	4.64	14.88	12.312	17.385	9.84219	37.1461	9.88	18.48	6	14.779
	0.2	23.6212	31.9628	5.05024	15.0742	12.2816	21.2325	9.42761	35.1525	9.96246	22.3753	7.15	15.5
	0.41	20.2473	32.4392	5.4096	16.5482	11.704	21.1225	10.5988	33.2446	9.64079	18.3198	6.28	14.5
	0.61	20.5316	32.1716	5.85408	15.408	12.5552	19.1868	10.5123	33.5328	9.73617	21.5129	6.77	13.806
	0.82	21.3449	33.222	6.47712	16.9003	13.7104	21.4326	10.9218	28.6761	10.3461	21.3682	6.12	15.63
	1.02	21.1486	36.1968	6.08	16.4801	19.684	21.6614	11.5493	27.8758	11.0449	22.5865	6.9	15.868
	1.23	21.6181	30.784	5.28	17.0784	31.8592	17.3454	13.6462	27.0965	11.5598	21.1024	6.5	14.0373
	1.43	23.2748	30.432	5.28512	16.7018	58.2008	20.616	17.2659	23.1383	11.9385	25.4104	8.76	15.473
	1.64	24.6413	30.6904	5.83328	17.4379	47.12	22.8308	22.5688	17.2159	12.8242	22.9016	7.58	14.2125
	1.84	34.0905	33.6504	6.63872	16.9056	42.408	27.0793	32.7503	21.7136	15.4725	22.5632	9.92	18.6375
	2.05	41.8484	35.3652	9.69728	17.9734	50.312	32.6217	55.1011	28.7439	19.0906	22.0977	11.3	24.3785
	2.25	73.1238	39.0968	15.0234	17.4677	72.8232	62.5834	93.9884	33.9447	25.5411	26.0304	17.27	35.9913
	2.46	129.355	49.2204	29.3603	19.8079	90.9872	105.953	136.251	47.2688	40.9817	26.5465	36.12	88.4188
	2.66	185.792	72.1556	64.024	23.5094	126.221	160.088	176.895	78.7666	74.0219	27.3896	75.32	146.701
	2.87	204.995	117.68	117.265	34.657	158.354	205.908	209.746	108.602	125.188	33.2209	111.64	193.334
	3.07	199.774	168.514	154.756	66.96	187.72	205.775	205.899	137.881	168.132	52.8	146.95	207.78
	3.28	182.204	195.618	179.744	123.816	202.859	195.093	180.347	179.485	193.764	96.8528	199.46	152.37
	3.48	158.273	202.336	194.761	170.238	187.842	203.544	154.215	201.129	201.522	146.604	200.54	144.526
	3.69	144.233	200.148	200.231	193.075	160.178	191.063	119.761	203.667	186.458	187.986	181.52	148.203
	3.89	135.505	198.27	193.769	196.413	119.472	199.113	99.96	171.38	158.075	191.842	132.37	127.027
	4.1	132.071	182.374	175.968	189.6	82.688	206.139	87.0012	141.393	130.447	161.725	75.3	107.79
	4.3	131.022	158.896	156.884	176.934	65.7704	204.814	76.1368	109.289	106.996	135.191	43.29	103.485
	4.5	139.31	135.288	142.056	158.113	69.3728	209.32	66.1884	95.8989	82.9808	130.856	36.12	89.7615
	4.71	155.718	106.272	125.83	141.601	83.144	207.619	58.444	89.6782	58.8179	132.773	36.18	83.9112
	4.91	171.473	95.3508	103.616	128.419	105.914	190.829	53.9019	97.8032	39.6085	121.716	39.74	83.7255
	5.12	163.937	115.721	83.7386	110.72	100.168	138.415	47.9361	116.446	28.1538	100.369	48.9	74.3083
	5.32	151.806	123.63	71.4115	101.358	75.1792	93.8288	38.2347	128.623	21.7734	72.1873	58.2	56.984
	5.53	134.409	139.02	63.4518	94.5888	60.9368	80.8465	29.3829	92.0858	18.0781	55.4928	39.79	37.727
	5.73	115.743	153.346	57.3104	86.0191	43.0768	73.1977	23.2036	66.5584	16.3503	50.6801	28.24	27.8775
	5.94	95.3605	158.284	53.0381	74.6549	45.5544	69.3374	19.5278	71.4749	16.3913	44.8153	18.49	29.9255
	6.14	75.8535	159.372	49.0109	70.6399	43.016	69.204	17.2805	78.7222	17.5262	38.1335	16.5	32.1435
	6.35	57.5567	164.486	44.5715	65.8507	31.8592	71.7898	16.4979	84.6472	19.0104	39.4711	17.38	35.392
	6.55	53.1487	177.126	43.9379	64.097	31.8896	85.0531	14.353	80.52	20.4157	38.8903	17.68	31.0847
	6.76	56.6414	169.049	48.0515	69.8081	27.6488	109.703	18.7513	67.2192	22.6811	43.5833	18.92	29.2845
	6.96	46.2097	142.354	53.4464	75.5083	35.0208	119.613	19.1398	57.9766	25.7847	46.9586	17.7	32.9765
	7.17	47.6029	118.844	58.6064	78.0533	38.988	127.581	16.4234	55.1734	26.2198	59.0577	14.45	44.9062
	7.37	45.4791	108.798	61.5101	77.5488	44.8096	118.292	14.6289	55.689	23.6702	55.616	13.88	51.303
	7.58	34.0783	70.9461	59.5347	84.5162	46.4968	108.987	12.8128	57.5982	20.5842	50.7857	15.9	51.7055
	7.78	36.5056	79.1067	53.2637	88.8672	45.2352	112.451	13.6517	55.4343	18.8708	43.8944	18.42	53.8837
	7.99	34.5319	89.4491	46.5958	73.5713	43.7608	105.595	16.4456	55.8448	18.7076	43.8649	17.86	53.0947
	8.19	33.8999	92.0549	44.4918	52.2134	40.28	93.6852	14.8802	59.0229	19.0295	36.7154	15.8	46.3757
	8.4	34.9335	83.7181	43.3549	42.2026	48.6552	83.0316	14.1111	56.8159	18.4613	28.6937	14.16	36.0868
	8.6	37.3907	77.024	38.087	38.0479	53.808	67.7827	15.3484	55.6288	17.0098	30.5769	15.42	25.5215
	8.8	41.9949	68.5931	33.1277	33.0432	54.9024	55.9429	14.8838	59.2904	15.8112	29.5368	15.49	22.4707
	9.01	46.8709	60.7549	34.9149	29.232	53.5952	50.3179	17.0375	72.4852	16.7044	31.9752	13.34	25.605
	9.21	50.0227	56.3429	40.065	31.68	57.836	49.9169	19.4832	87.3008	19.1606	33	12.8	26.0287
	9.42	54.293	73.7523	42.1632	33.9221	61.9552	53.3135	18.585	89.7266	20.8694	28.5199	12.3	25.0068
	9.62	56.2991	96.3075	39.4186	42.1898	58.2464	54.0323	16.6106	93.5383	20.4324	37.1166	11.61	28.6107
	9.83	53.0669	96.1219	34.337	45.1999	62.2592	57.1807	14.519	95.6459	18.4779	39.5063	11.4	29.4528
	10.03	53.7919	93.1616	29.0947	46.0118	65.3752	54.2344	14.3463	77.4919	16.8123	51.4664	12.64	27.5685
	10.24	59.897	77.7651	25.7002	47.0933	70.832	48.4868	12.5808	76.9569	15.6315	50.0135	13.4	27.8412
	10.44	68.197	81.0605	25.6803	50.8193	81.0312	51.0763	11.8051	61.5322	14.5128	55.4343	13.24	29.6582
	10.65	72.4637	91.6784	25.4125	53.7547	87.4304	52.8413	13.1362	48.1065	14.6433	51.48	13.7	29.1773
	10.85	64.9868	75.4549	24.9158	53.9083	104.667	47.5525	12.3717	39.4592	15.3649	46.3448	15.06	27.6857
	11.06	59.2164	62.5707	24.4666	46.224	92.3552	47.1136	10.6178	41.7424	15.1778	40.2688	16.24	24.3927
	11.26	45.4464	60.8677	22.9501	35.6534	57.076	46.3783	10.6495	45.5149	14.4349	38.8177	15	24.6737
	11.47	37.5682	67.3019	20.463	27.2033	36.6928	43.6657	11.4247	49.2268	14.452	28.9111	12.66	23.193
	11.67	38.4372	67.2731	18.7286	22.3327	24.8672	45.7941	10.0666	45.8858	15.3503	25.7312	13.61	21.9443
	11.88	31.8413	52.8888	20.3677	19.6831	14.2272	47.0504	9.14527	45.687	15.1105	23.459	15.32	20.278
	12.08	27.972	58.1683	21.7766	19.1551	14.744	48.5495	8.62847	41.1638	13.9234	21.0927	8.29	20.746
	12.29	23.3573	70.5523	21.6726	17.28	12.92	52.1345	9.50912	41.712	13.7693	21.7065	7.8	23.529
	12.49	18.2945	70.2411	22.5971	16.159	11.552	49.8325	9.42742	43.8777	14.6062	24.6145	6.57	26.3665
	12.7	16.5647	56.5875	23.2125	16.7114	13.376	38.3262	8.53632	39.0342	15.2142	24.3153	6.54	26.1185
	12.9	15.6303	50.4213	21.5437	17.8464	12.54	34.9892	8.9718	35.5419	14.733	22.7744	7.61	23.8133
	13.1	14.841	44.7496	20.0042	18.2422	12.6464	29.7717	9.60488	34.0657	13.9709	22.3736	6.4	18.8285
	13.31	13.9864	40.7576	18.4896	20.9333	13.528	32.2167	7.98019	32.5332	14.0687	23.1735	6.75	16.531
	13.51	14.2364	36.9235	18.5027	23.6383	12.0688	38.0227	8.06493	30.136	14.0955	22.8624	7.32	15.1107
	13.72	13.7493	38.224	24.7296	24.9216	11.6128	47.9849	8.19774	32.6577	14.1529	22.7295	5.42	13.9083
	13.92	15.0183	50.3829	40.1802	25.4006	11.9472	39.7384	8.38166	33.8994	15.7026	22.1232	5.84	14.4307
	14.13	13.6996	60.9723	60.7338	25.4369	10.6856	22.5065	8.62733	31.6699	17.2569	20.5625	7.18	15.8525
	14.33	14.1377	62.1629	75.6	20.9599	13.376	20.4912	8.51447	30.4572	17.6846	20.2888	6.8	15.453
