# Supplementary material for: CD31 signaling promotes the detachment at the uropod of extravasating neutrophils allowing their migration to sites of inflammation
Source: eLife. 2023 Aug 7;12:e84752. doi: 10.7554/eLife.84752 (PMC10431918; doi:10.7554/eLife.84752)
Supplement: Figure 2—source data 4. [file elife-84752-fig2-data4.xlsx]

## Sheet: Fig. 2J
	Quantification of mean fluorescence intensities (MFI) of CD31 (clone WM59), total CD11a (clone TS2/4) and opened CD11a (clone NKI-L16) along the cell axis
	Distance (µm)	CD31					CD11a					NKI-L16
	0	10.257	10.595	4.97315	0.577135	7.30922	28.8	14.8	27.798	4.05983	8.20008	6.084	9.49	5.98146	6.01076	6.88979
	0.2	9.00555	10.595	5.3313	1.73144	5.26094	29.007	14.8	22.9495	4.97196	2.95344	6.63355	9.49	7.06337	6.28512	8.87754
	0.41	10.7724	10.595	9.2313	3.50554	4.45182	28.1978	14.8	24.298	7.12698	8.58648	8.0427	9.49	8.34673	6.14917	11.6502
	0.61	12.1664	10.595	9.1	1.74294	7.37006	29.1078	14.8	26.1195	8.4512	-0.35896	7.5575	9.49	7.99271	7.23072	16.6057
	0.82	11.7349	10.595	13.1846	7.75882	15.7842	30.9382	14.8	25.2295	6.30378	3.87352	7.90581	9.49	8.44303	7.22498	24.0736
	1.02	9.92289	10.595	14.2883	8.0315	25.5971	30.6056	14.8	24.1605	10.5335	1.24264	8.21796	9.49	9.84474	9.59927	25.9209
	1.23	12.1226	10.595	19.8042	19.4922	33.3197	29.2956	14.8	21.197	8.55998	3.2732	8.74084	9.49	11.752	13.1507	21.2028
	1.43	18.042	10.595	19.7503	32.1231	31.1443	30.3372	14.8	25.6375	14.4243	3.01728	9.54556	9.49	16.3442	16.4146	20.4469
	1.64	25.4638	10.595	22.1474	58.375	22.9965	31.654	14.8	23.0595	30.158	-0.7924	12.1363	9.49	18.0425	19.7434	23.2812
	1.84	41.4135	15.9608	24.2886	111.8	55.602	33.776	16.1437	24.7295	67.9343	6.79952	16.4883	10.5934	16.4969	29.3055	25.1639
	2.05	68.3453	20.8157	34.7002	203.368	97.4207	33.4062	20.4956	26.3485	81.6075	14.0347	26.6891	13.2682	16.6572	44.8057	26.9462
	2.25	126.026	33.9747	50.9028	242.98	158.23	44.779	19.2415	32.601	83.2722	42.6345	42.6056	19.1578	18.3813	54.7375	25.5076
	2.46	192.228	52.2685	69.2998	199.703	203.799	60.8102	18.9209	37.197	76.8924	67.6357	50.733	27.4847	25.0926	65.1076	21.2977
	2.66	244.708	112.135	91.9958	140.294	237.895	74.2572	31.7739	53.7475	59.3923	66.5274	57.096	41.167	34.0862	65.5552	14.9927
	2.87	247.902	172.173	95.55	106.792	199.145	85.6486	64.4972	50.1055	43.0472	80.3818	64.523	58.4763	29.4692	53.4558	12.7418
	3.07	233.318	196.524	118.831	91.8191	153.531	90.3148	91.7052	43.445	36.6483	106.812	63.9936	65.6519	17.6791	36.3838	11.7467
	3.28	207.926	215.38	146.763	99.7922	164.539	91.1296	91.7468	49.7845	34.1478	130.072	54.265	72.6396	10.8704	25.7557	10.5194
	3.48	159.065	242.512	181.899	98.1456	215.279	82.9208	86.2116	51.688	27.3581	139.1	42.1194	90.6783	9.18351	20.2195	9.7916
	3.69	107.371	238.163	229.009	77.2374	255.062	68.9642	104.508	55.486	22.3042	152.276	31.8225	92.978	8.55566	13.722	8.76252
	3.89	80.5215	195.249	209.98	51.1063	247.325	63.2902	112.45	50.5365	13.1572	161.511	30.1184	74.685	6.29346	11.2315	9.5031
	4.1	65.7057	157.575	189.746	34.4825	198.149	60.9876	84.3719	55.023	10.5004	136.223	33.1631	58.919	6.74762	11.1644	10.4443
	4.3	60.114	113.146	189.83	23.8683	150.364	60.271	64.1528	48.6695	13.6682	114.533	36.8121	51.7339	5.83066	9.55551	10.2833
	4.5	62.5032	82.5928	162.977	20.846	92.8996	62.6278	53.4263	38.8715	15.4611	125.329	42.6658	55.3149	4.73918	10.0039	9.94646
	4.71	59.6827	61.8407	152.893	23.0814	48.7304	66.4788	68.8474	43.3255	20.0841	115.829	57.7888	58.587	5.28778	12.6573	8.70303
	4.91	52.121	72.43	141.378	20.4672	35.5451	77.251	70.5078	40.2525	26.739	99.1861	66.9488	57.0145	6.65215	13.7978	8.17648
	5.12	44.5591	97.8253	146.316	22.3324	24.8906	74.0522	68.5096	37.743	30.6671	73.4261	61.0067	55.4282	8.49742	15.6509	7.17933
	5.32	43.1155	91.9385	137.4	29.1585	22.2583	63.4572	70.6757	40.61	25.719	72.4562	49.2068	48.9402	12.6794	17.9553	7.3165
	5.53	43.5045	74.1185	101.4	27.4381	36.1778	63.6966	64.7999	52.087	19.6543	62.4288	48.8152	43.7507	16.4883	17.9119	9.8151
	5.73	50.8331	65.62	85.8474	23.352	49.3571	68.948	55.3143	51.454	21.7444	56.4346	50.1619	47.4539	17.6218	16.0666	13.147
	5.94	56.1439	55.0908	72.943	32.7492	43.703	70.346	69.8368	39.101	29.2142	46.2073	45.5586	51.0492	25.9856	15.7395	20.1354
	6.14	58.8502	38.1985	66.2818	33.4184	38.27	69.9206	90.2835	33.7475	27.032	55.8337	39.0145	47.4067	41.3891	19.2294	15.1936
	6.35	60.0045	45.129	63.0857	28.8015	26.2244	77.1144	72.8986	29.8715	17.7063	60.3361	38.7305	42.2718	33.2656	20.8233	8.8087
	6.55	59.1653	43.577	52.3341	25.0048	16.0736	82.2694	48.1225	24.2155	11.8457	41.8107	36.5069	36.183	22.1634	17.8133	7.19732
	6.76	56.3695	42.3604	59.9787	22.8141	20.354	81.0452	42.3901	34.858	18.874	34.9429	35.2693	34.1433	16.4368	16.1733	6.53422
	6.96	62.009	48.7763	76.8014	23.7466	22.1413	78.2264	36.1713	35.7935	27.7665	35.4217	38.7791	35.4416	15.2021	18.1219	5.75692
	7.17	61.973	55.0044	57.0388	21.1319	22.9985	81.935	45.1705	38.0185	29.2725	36.857	43.524	36.43	13.6946	26.376	5.82858
	7.37	57.7729	52.5314	77.183	19.227	23.2736	83.1744	53.2461	24.821	28.5392	43.3009	45.3745	37.2061	18.0998	29.6346	6.76094
	7.58	58.6736	64.2932	68.1428	22.0513	18.7444	79.993	58.1065	28.014	28.1541	53.48	46.1748	36.485	17.8546	28.5097	7.31817
	7.78	57.4278	52.7558	66.7355	26.8879	27.1863	77.785	68.9835	32.9585	25.071	63.2912	49.03	37.8655	13.1021	29.9667	8.50294
	7.99	63.3713	48.3627	57.5458	31.6988	34.7866	87.9428	69.8116	32.486	22.9341	70.1898	68.0605	36.7052	13.4847	30.8482	8.64292
	8.19	88.1839	45.5799	56.1444	38.1402	36.3164	100.89	55.8021	33.0825	27.0964	70.6345	95.9139	36.4559	15.4169	30.3438	8.89356
	8.4	93.3609	38.805	66.6341	39.4567	46.7356	106.134	45.425	31.697	31.5069	61.1206	107.377	35.36	33.2704	27.5893	10.8713
	8.6	76.9699	31.5136	65.6559	35.5135	49.111	104.52	47.9468	35.679	31.073	46.9454	102.275	38.1798	38.3674	22.034	12.853
	8.8	73.9357	31.0422	56.3888	43.4603	37.5291	101.489	55.3888	30.624	30.0536	31.5448	81.3782	45.4366	32.3202	16.9395	14.388
	9.01	64.2929	40.7415	59.2989	54.3586	37.859	93.3012	70.5743	30.7475	33.4941	21.1249	61.3301	51.9506	31.4891	14.4374	15.7349
	9.21	55.9767	59.5967	55.6374	54.6375	47.4177	83.088	73.0792	30.5	33.6245	26.2539	51.1831	62.6314	26.1936	14.727	15.386
	9.42	54.8221	101.299	62.6268	53.234	57.3082	79.8672	84.3929	33.165	36.6742	29.1743	49.9849	74.5384	29.12	15.9162	16.207
	9.62	58.2496	90.7878	72.2871	55.0516	50.388	83.365	97.3436	44.087	41.67	37.3722	50.5025	93.7316	33.5891	18.7673	15.792
	9.83	58.8541	75.0758	62.5489	56.959	54.275	87.152	94.7977	40.734	46.8241	38.3824	51.755	124.903	40.0304	23.023	16.1027
	10.03	57.036	68.9501	65.7274	64.3703	38.4694	94.426	121.87	30.165	55.5841	35.5146	54.9173	158.598	45.1465	26.6354	15.0216
	10.24	58.3554	60.2801	50.1215	72.6284	23.9456	98.2438	156.214	34.853	67.3943	36.5585	61.1217	163.56	47.8457	32.052	14.9284
	10.44	56.8667	52.4022	48.1715	71.8154	51.158	95.3554	159.354	32.422	73.3027	25.7438	69.0357	159.063	54.5275	39.0826	14.6568
	10.65	49.0787	50.4835	49.74	75.0102	62.94	79.2858	162.033	35.7705	82.294	16.3951	73.8103	166.747	56.2964	43.2567	17.8325
	10.85	45.6845	46.8162	52.793	71.0538	82.3858	76.9912	151.904	34.28	88.467	15.8379	85.5515	204.792	65.6583	42.2886	20.9661
	11.06	39.3487	60.6464	59.633	59.9648	100.536	85.709	173.987	36.4955	106.583	23.5099	95.8828	270.767	80.8042	45.9783	23.1977
	11.26	40.2488	84.5885	63.9028	60.3323	108.954	96.2934	220.037	41.5275	107.977	29.8178	113.888	295.767	106.398	62.2824	24.9673
	11.47	39.399	98.3272	54.2243	63.0882	96.884	104.002	245.534	48.39	104.77	29.7466	136.416	236.774	134.326	74.6659	24.8331
	11.67	43.2338	102.877	45.697	66.2743	86.7723	112.665	201.514	43.9815	121.234	36.8928	160.787	166.458	177.157	81.2516	22.1991
	11.88	46.473	96.7693	43.7886	63.8156	91.8741	66.9723	140.473	43.922	136.859	50.8155	191.615	121.464	237.232	90.8023	21.1193
	12.08	48.7581	81.6746	38.1654	55.893	106.196	70.9743	102.325	49.142	133.839	61.544	212.196	93.8192	288.729	102.281	24.3886
	12.29	51.3257	102.787	44.8025	52.2994	93.8791	70.4167	94.4303	49.757	140.735	70.4665	225.398	77.0251	292.65	115.296	32.7931
	12.49	52.7206	92.6124	49.9187	57.9325	83.0293	73.6898	91.5816	52.0185	164.77	77.9486	239.898	68.3761	295.17	124.077	44.732
	12.7	66.3435	81.0035	35.6902	71.4063	59.2422	88.6649	76.8627	56.491	185.32	77.3153	255.142	58.7063	210.077	153.027	63.3843
	12.9	86.973	66.939	38.5229	90.839	57.2548	109.163	64.4416	53.5	187.957	92.3877	247.254	50.05	91.7452	201.2	91.2075
	13.1	81.9411	55.61	40.4489	94.6996	66.9493	123.278	51.1055	61.257	165.954	99.4403	239.536	43.3459	40.0085	246.862	130.398
	13.31	75.3462	41.5368	50.9743	92.6174	63.2354	125.386	38.0505	68.624	113.379	90.5934	224.222	34.9276	26.5925	264.562	181.276
	13.51	57.1144	34.4229	59.0129	83.5158	61.2094	91.8628	33.1918	83.477	72.7904	101.053	118.854	24.2849	21.9831	235.39	231.871
	13.72	27.3028	26.9664	72.9612	57.1515	54.3061	46.1744	23.7352	104.266	39.8056	127.658	49.0907	16.6539	16.1543	179.93	262.925
	13.92	17.2539	17.1829	69.1568	50.0882	56.2239	26.3598	18.2507	140.995	22.7734	125.561	26.3982	13.1784	12.376	126.194	260.332
	14.13	12.5316	12.956	82.4187	44.4216	52.1557	37.3966	18.0287	201.202	15.4178	127.428	18.2586	11.3305	13.1259	85.243	249.521
	14.33	10.1789	15.4644	65.9002	33.1209	69.1977	34.735	16.5703	203.197	11.9579	139.601	13.4903	9.73778	10.8962	59.8511	222.349
	14.54	8.44921	17.0292	60.7782	12.518	84.7518	31.5676	12.7563	187.06	12.2553	114.357	11.302	9.62221	8.10628	42.7648	171.873
	14.74	7.79602	18.3828	57.8799	0.724243	76.3383	31.8738	14.1511	171.028	11.2192	95.1244	11.042	8.15204	7.44983	29.5326	118.214
	14.95	9.49211	22.3199	43.3413	2.90634	81.1926	30.935	14.7871	135.472	6.5674	82.6958	10.1343	7.83276	6.75522	22.045	74.7316
	15.15	9.86407	18.33	21.0444	-1.60467	74.7815	28.571	11.3	66.9955	5.27086	76.1561	10.0186	7.28	6.47951	16.4286	44.1132
	15.36	5.62234	10.595	16.4112	2.84206	46.263	30.3942	14.8	48.936	9.52725	66.9396	8.45945	9.49	4.78972	11.834	26.4824
	15.56	6.27621	10.595	14.3416	4.36218	24.1775	27.1956	14.8	38.436	4.41287	62.3722	7.97577	9.49	4.85462	10.5509	17.9017
	15.77	7.40394	10.595	14.5925	0.880022	14.0922	27.4958	14.8	41.225	8.32013	52.2894	9.03872	9.49	0	9.72785	13.6198
	15.97	11.6332	10.595	14.0257	1.5453	7.64722	28.1714	14.8	40.5735	3.4265	48.2815	8.82519	9.49	0	8.96992	9.70674
