# Supplementary material for: CD31 signaling promotes the detachment at the uropod of extravasating neutrophils allowing their migration to sites of inflammation
Source: eLife. 2023 Aug 7;12:e84752. doi: 10.7554/eLife.84752 (PMC10431918; doi:10.7554/eLife.84752)
Supplement: Figure 3—figure supplement 1—source data 1. [file elife-84752-fig3-figsupp1-data1.xlsx]

## Sheet: Figure 3-figure supplement 1 B
	RT-QPCR analysis showing the expression of the different CD31 exons in the spleen of WT or Pecam1ITIM-/- mice
	Exon(s)	wt		Pecam1ITIM-/-
	2-3	1.10156	0.907806	0.715577	0.23041
	3	1.15055	0.869147	0.726485	0.708442
	3-4	1.09867	0.910187	1.49528	2.41439
	4-5	0.844921	1.18354	0.586591	0.927645
	5-6	1.12141	0.891731	0.838801	0.951977
	6-7	0.778907	1.28385	0.823859	1.09149
	7-8	0.81708	1.22387	0.825994	0.868517
	8-10	0.798563	1.25225	2.00112	1.29991
	9-12	1.04162	0.960043	0.243914	0.313325
	11-12/13	0.900494	1.1105	0	0
	12-14	1.04722	0.95491	0.00311901	0
	14-16	1.19317	0.838102	0	0.0181015
