# Supplementary material for: CD31 signaling promotes the detachment at the uropod of extravasating neutrophils allowing their migration to sites of inflammation
Source: eLife. 2023 Aug 7;12:e84752. doi: 10.7554/eLife.84752 (PMC10431918; doi:10.7554/eLife.84752)
Supplement: Figure 3—figure supplement 1—source data 4. [file elife-84752-fig3-figsupp1-data4.xlsx]

## Sheet: Figure 3-figure supplement 1E
	Hematological parameters and blood formula of WT and Pecam1ITIM-/- mice
	Pecam1ITIM	Hemoglobin
	+/+	14.04	17.44	14.72	17.6	14.92	14.2
	+/-	16	14.67	15.39	17.12
	-/-	15.58	13.66	15.74	13.63	16.08	16.26	15.75	15.36	17.44	15.1	16.5
	Pecam1ITIM	Hematocrit
	+/+	43.1	56.04	47.13	56.75	47.57	43.75
	+/-	51.5	45.9	48.21	54.93
	-/-	48.19	43.07	50.92	41.57	50.95	53.48	50.73	49.19	57.05	47.63	53.46
	Pecam1ITIM	Platelets
	+/+	2398	1389	1695	1384	1383	1091
	+/-	1455	1752	1620	1212
	-/-	1607	1840	1184	2309	1494	1422	1589	1418	873	1627	1144
	Pecam1ITIM	RBC
	+/+	8.7	11.14	9.68	10.12	8.97	7.65
	+/-	9.56	8.83	9.48	10.37
	-/-	9.66	8.59	10.03	8.35	9.75	9.67	9.36	8.61	10	9.36	10.36
	Pecam1ITIM	WBC
	+/+	5.24	4.33	5.45	9.48	9.78	5.37
	+/-	7.19	6.08	10.25	8.13
	-/-	14.06	7.89	7.09	7.44	7.61	6.77	8.74	4.84	8.23	7.57	7.4
	Pecam1ITIM	CD4+
	+/+	14.7	4.3	12.6	2.9	11.7	7.4
	+/-	12.7	2	16.6	11.5
	-/-	10.7	11	15.8	9.4	12.7	10.4	12.4	13.5	16.9	13.6	13.8
	Pecam1ITIM	CD8+
	+/+	12.6	13.4	10.2	7.1	10.4	5.1
	+/-	12.6	5.2	11.2	11.6
	-/-	8.7	8.5	13.6	8.7	11.8	11.5	9.9	11.8	12.8	9.1	10.5
	Pecam1ITIM	B cells
	+/+	39.4	31	52.5	36.1	45.9	22.5
	+/-	48.9	16.2	46.4	48.5
	-/-	35.7	26.9	36.8	30.7	51.7	50	51.7	38.5	48.4	32.8	40.4
	Pecam1ITIM	Monocytes
	+/+	7.3	6.8	6	6.3	5.9	10.1
	+/-	4.8	6	3.4	4.3
	-/-	7.8	10.9	8.3	10.3	4.2	5	5.3	5.8	5.1	10.4	7.6
	Pecam1ITIM	Neutrophils
	+/+	16.4	23.7	12.1	19.5	15.4	47.4
	+/-	8.2	58.9	7.7	9.7
	-/-	30	34.4	17.5	32.6	4.8	10.7	11.3	20.1	7.8	24.2	19.8
