# Supplementary material for: CD31 signaling promotes the detachment at the uropod of extravasating neutrophils allowing their migration to sites of inflammation
Source: eLife. 2023 Aug 7;12:e84752. doi: 10.7554/eLife.84752 (PMC10431918; doi:10.7554/eLife.84752)
Supplement: Figure 3—source data 1. [file elife-84752-fig3-data1.xlsx]

## Sheet: Figure 3B
	Quantification of mean fluorescence intensities (MFI) of polymerized F-actin (phalloidin) and Talin (polyclonal ab71333) along the cell axis of WT neutrophils
	Distance (m)	Actin					Talin
	0	60696	177469	180000	156800	196678	34018.8	72000	20310.4	44742.4	45538
	0.2	79518	194093	163923	131600	182389	24460.4	21882.7	15309.2	34259.2	48528
	0.41	44304	214109	164862	136300	152245	17040.4	20425.8	21843.8	32894.4	47588
	0.61	107496	249344	162846	141547	154270	17405	16673.8	17232.7	37071.2	46769
	0.82	60000	294666	166989	137861	177600	16863.1	14441.1	28510	28800	39000
	1.02	178314	350387	194208	151553	540765	32815	155835	115683	40577.6	913226
	1.23	155142	409043	30631.5	207133	519101	32378	241140	324541	57488	1104500
	1.43	154266	446426	65127	161308	519971	31656	355479	701325	63424	1341231
	1.64	186894	422013	89409	154505	594912	37758	450886	1.23007e+06	66163.2	1660926
	1.84	203817	453546	97344	142061	699952	41010	520730	1.52512e+06	86800	1972620
	2.05	220203	479834	55849.5	181903	787384	52278	607038	1.21764e+06	113903	1837727
	2.25	290610	468416	68964	258882	754667	76212	715042	806038	140648	1507333
	2.46	356130	431485	103458	431375	668765	105637	839634	1.0359e+06	178286	1234400
	2.66	447780	409306	65721	636556	583386	152490	977896	1.31547e+06	273755	1081211
	2.87	538599	383331	66246	684202	533720	245878	1163706	1.57894e+06	455423	975773
	3.07	590388	360982	87895.5	583586	555776	397133	1350828	2.01225e+06	804769	979160
	3.28	600633	374458	129657	569250	605000	571189	1.40292e+06	2.23371e+06	1.08809e+06	1083049
	3.48	581187	359024	110949	547665	599648	724122	1.44365e+06	2161230	1.05965e+06	1180612
	3.69	537477	346461	66946.5	571837	572253	851825	1538793	2053065	1075008	1217277
	3.89	491991	333408	124500	609629	535366	940614	1649778	1.70052e+06	1.2058e+06	1177071
	4.1	524586	314880	143400	645833	545275	1019581	1738647	1.55778e+06	1.33388e+06	1094045
	4.3	733200	324611	197730	649638	510800	1089400	1.71259e+06	1.63524e+06	1.39158e+06	1010000
	4.5	891012	327350	292310	691205	456878	1263876	1.67111e+06	1.6947e+06	1.53914e+06	940854
	4.71	935214	302134	328360	744360	434560	1606356	1745880	1556405	1.67418e+06	930436
	4.91	802629	296243	281492	787818	441557	1937713	1.85531e+06	1.37191e+06	1.77705e+06	913525
	5.12	685755	295430	284226	765442	443045	1885253	1984917	1.39248e+06	1.87658e+06	962674
	5.32	552657	250784	317004	634641	459710	1493418	1935381	1.40912e+06	2.04984e+06	972479
	5.53	433482	223965	255774	600034	477824	1252808	1798176	1.52492e+06	2040560	873160
	5.73	361266	243549	214954	587831	444098	1032689	1.5843e+06	1583830	1.68356e+06	730646
	5.94	294570	255341	229770	616858	394389	822769	1.27657e+06	1.75464e+06	1412424	849633
	6.14	253653	240890	204424	608783	379915	649490	1.04279e+06	1.81718e+06	1.47883e+06	951768
	6.35	252495	229350	213099	476118	424533	508537	957165	1.85603e+06	1491672	915778
	6.55	267531	236726	156987	424329	426326	424148	837494	1.76042e+06	1.42601e+06	829941
	6.76	258489	222400	181563	421947	407312	415557	710655	1.58959e+06	1222672	734720
	6.96	288351	214582	139527	469829	363510	465366	642786	1341245	962572	670355
	7.17	287334	230925	101004	568418	351019	502278	661262	1.24069e+06	831171	586653
	7.37	236205	223216	54000	652058	353699	553974	728217	1.062e+06	882792	513438
	7.58	220320	248589	111986	627448	354803	544400	755724	979397	1.00007e+06	487921
	7.78	220389	241411	142636	661165	277528	415589	754286	872243	1.01243e+06	504564
	7.99	203766	227382	142491	787851	274240	279949	691560	779006	908376	630880
	8.19	187068	229046	116576	841046	271670	211803	696888	672595	859154	721737
	8.4	201765	241827	138080	780366	301778	194321	766082	518590	926673	684083
	8.6	205200	205872	140214	675909	295176	188200	830662	460139	1.11482e+06	610432
	8.8	193533	281984	212488	582910	291883	178885	798200	381520	1.26199e+06	647582
	9.01	182202	274509	213418	475525	334093	169454	592014	379427	1.2314e+06	761445
	9.21	181041	225325	144688	417943	366944	161837	493264	409143	1.0906e+06	798780
	9.42	194502	214893	110354	367497	381322	164830	567300	470825	935651	801694
	9.62	191586	237670	63895.5	300805	390933	152522	706196	632942	769253	858049
	9.83	194805	251562	89164.5	274842	412232	162425	783502	774805	676445	892463
	10.03	208134	253782	68875.5	239292	425310	180667	732420	748868	604089	971567
	10.24	216981	241658	91081.5	208293	423914	186052	677522	516540	502745	981447
	10.44	195858	192986	75604.5	191975	398400	185378	745698	282340	444277	926000
	10.65	229767	211757	71203.5	181741	389710	173850	778569	158872	432654	866922
	10.85	212565	210883	82267.5	182645	377874	150926	691054	98579.2	376016	871448
	11.06	257877	177549	71991	195229	350544	144139	557458	65138.1	294959	916138
	11.26	242865	215488	66384	209783	324096	172209	503108	93832.3	273810	897484
	11.47	245067	221837	115114	215292	357267	232900	427352	95270	275753	867347
	11.67	241629	229955	119250	227651	352880	276355	379888	71631.5	274584	851320
	11.88	225597	225949	102585	256108	324786	273729	393264	107659	300886	756742
	12.08	223200	214086	204816	253583	304704	226237	418215	106707	350369	672591
	12.29	249918	218534	80469	220938	290277	206112	624822	106802	386997	596677
	12.49	251664	213475	127233	201334	258578	178886	658162	87829.2	398682	522861
	12.7	276717	216832	140361	204943	288997	191205	531645	167326	371658	545086
	12.9	302400	221549	84540	190449	299456	218100	425012	124159	360118	588520
	13.1	344610	209280	110066	168700	297715	281891	365422	156058	373878	646490
	13.31	373932	244093	113979	162599	315664	319346	332100	209539	342271	599292
	13.51	411318	250922	163869	176978	292701	333125	281980	262248	291886	483875
	13.72	321156	246678	153603	190219	266958	319929	293006	297624	293556	388436
	13.92	307035	248525	87543	192667	259757	279725	374176	315105	316252	326288
	14.13	322212	264550	89617.5	191064	270160	247555	562748	369257	343288	344800
	14.33	327666	284275	67632	211873	255136	243334	668734	401527	336877	421181
	14.54	302043	212979	104746	212209	259555	263686	695674	367482	329090	418000
	14.74	313860	236925	109809	198215	245640	311578	712185	261540	323614	394767
	14.95	280365	269558	103318	184793	249126	344154	661220	196792	297246	344664
	15.15	277764	291392	118416	194631	273469	288896	579105	131683	270169	339775
	15.36	271407	290416	68503.5	182732	297664	243133	366776	150838	237232	344960
	15.56	255636	264458	99511.5	189067	301667	234485	354026	155794	212501	315062
	15.77	261600	245770	160000	205320	314310	226134	413050	249092	214967	295826
	15.97	239913	270080	159888	217524	268037	186776	514128	363527	261949	332022
	16.18	256881	288890	173008	224472	258802	191664	509016	366320	323094	360036
	16.38	326178	355235	149308	214721	261488	178440	512571	404740	362832	397707
	16.59	383964	458714	174694	224567	309200	191735	510360	452772	355728	430250
	16.79	503373	521021	35293.5	223821	396714	278592	499977	502564	297492	430207
	17	702531	505558	101211	218000	548317	412781	484326	499870	248005	381080
	17.2	921600	447200	137946	196531	795835	530700	513519	531030	283017	322450
	17.4	1232244	442755	207740	296276	1.17129e+06	607344	532810	567002	356426	255502
	17.61	1550583	478573	200570	475994	1.53917e+06	690086	26747	182568	830467	396144
	17.81	1814718	499005	193947	773517	1793664	661880	24983	123434	983417	367175
	18.02	1896762	613997	283962	1.19922e+06	1.87684e+06	591680	27271	100996	867935	307670
	18.22	1842330	853901	506955	1.61264e+06	1.93811e+06	484290	28500	85974	846315	247446
	18.43	1728000	1.39195e+06	790344	1860138	1890216	397194	31213.1	83725.5	827298	196322
	18.63	1683468	2075536	1.17233e+06	1.93331e+06	1.77476e+06	311489	500688	79374	503387	162142
	18.84	1449426	2065664	1.84825e+06	1.80443e+06	1588760	231190	428098	72000	208083	128787
	19.04	917181	1.35092e+06	2.24499e+06	1321264	1325104	185478	345256	83725.5	71453.9	72011.2
	19.25	585237	723066	1.04845e+06	739416	968925	144233	238746	79374	31576.9	55903.2
	19.45	374400	446947	295587	435196	604331	103979	206262	365407	25137.7	46504.8
	19.66	285453	319747	127293	313047	333299	67837	215382	337992	16330.8	44375.2
	19.86	242634	249219	80851.5	225347	236506	47179	251234	405025	20031.9	40033.6
	20.07	206334	217328	42502.5	222617	216166	36745	303646	442062	22555	38643.2
	20.27	199113	196474	214109	175721	191744	34117	411956	560568	368724	31049.6
	20.48	199749	179773	249344	167574	184693	30147	556504	607028	347321	38700
	20.68	185406	172800	171309	187802	210133	28080	526410	634725	334060	35706.4
