# Supplementary material for: CD31 signaling promotes the detachment at the uropod of extravasating neutrophils allowing their migration to sites of inflammation
Source: eLife. 2023 Aug 7;12:e84752. doi: 10.7554/eLife.84752 (PMC10431918; doi:10.7554/eLife.84752)
Supplement: Figure 3—source data 2. [file elife-84752-fig3-data2.xlsx]

## Sheet: Figure 3C
	Quantification of mean fluorescence intensities (MFI) of polymerized F-actin (phalloidin) and Talin (polyclonal ab71333) along the cell axis of Pecam1-/- neutrophils
	Distance (m)	Actin						Talin
	0	292516	182995	167293	204508	236000	317400	67611	17496.8	153825	79308	108300	93500
	0.2	100930	155000	173600	208000	233200	284489	74925	16444.5	165416	68496	111146	87028.1
	0.41	109298	156932	167293	204508	240604	296426	73527	14500	178500	72750	106810	88202.8
	0.61	228578	151195	28955.6	224028	193254	285607	75862.5	16091.5	390966	87907.5	105667	88163.7
	0.82	90036	151200	195243	248000	228446	279788	78168	14750	137696	79500	106864	89556
	1.02	167436	137500	59789.6	206696	244544	271342	73951.5	11578.8	162244	76227	92055	83306.8
	1.23	312350	137500	59789.6	222508	236030	245865	75387	14750	137696	78156	110291	93477.9
	1.43	313196	155155	75006.8	237988	250168	260848	82339.5	11578.8	162244	84133.5	118573	88593.8
	1.64	239264	151195	28955.6	237212	245222	260664	81502.5	13912	246000	86883	112689	87482
	1.84	210304	151200	195243	223640	269552	277362	86371.5	16091.5	390966	84648	117399	101961
	2.05	211212	137500	59789.6	214932	254358	328585	82279.5	14750	137696	92650.5	120952	124375
	2.25	283210	155155	75006.8	240988	238782	376126	86289	11578.8	162244	106078	122451	154737
	2.46	271410	151195	28955.6	248292	269452	485951	95248.5	13912	246000	129180	131493	202531
	2.66	223200	151200	195243	261088	278448	650631	107646	16091.5	390966	166858	147837	254995
	2.87	273678	146448	315318	270708	279224	852523	127058	15405.2	779706	243964	143623	333504
	3.07	327472	160350	754435	358648	354644	1.10873e+06	148107	14322.5	1477425	445074	171673	497462
	3.28	260758	169755	1.66736e+06	561860	524014	1.19778e+06	201296	17138.8	1.87643e+06	598624	234243	715926
	3.48	358074	150835	2.49966e+06	789072	944348	1.1709e+06	295764	17118.2	1.54997e+06	742504	306134	832325
	3.69	468424	168540	1.92e+06	932660	1431294	1.15964e+06	405806	17406	1.11464e+06	843366	554114	974646
	3.89	706008	172350	911942	985528	1644810	1.22821e+06	567346	19197.8	931611	847497	895079	1.11378e+06
	4.1	958822	161700	469272	964924	1580428	1.62865e+06	867296	20630	643852	850722	1.25206e+06	1.32133e+06
	4.3	1356824	175295	383822	932408	1274176	2.10306e+06	1.32257e+06	20022.2	568347	844196	1.35111e+06	1.58847e+06
	4.5	1919944	159440	346011	774408	968854	2.18934e+06	1.62516e+06	29351.5	566709	803901	1.45156e+06	1.88386e+06
	4.71	1755914	193135	205773	722988	755300	1.84606e+06	1815873	42578.5	582808	847224	1.54786e+06	1.98478e+06
	4.91	1546140	238515	136956	647772	700544	1.50603e+06	1.90686e+06	67892	608115	920230	1.61292e+06	2.04203e+06
	5.12	1499312	391500	114092	587904	753280	1.32478e+06	2089236	120895	630202	997416	1669568	2133755
	5.32	1462324	552815	141038	560848	839000	1.17067e+06	1944369	209150	722475	1.07824e+06	1.76953e+06	2.06994e+06
	5.53	1259976	644142	180631	536952	806468	987947	1.74209e+06	325586	815619	1.0674e+06	1827610	1.88048e+06
	5.73	976904	670395	311019	555044	739600	840903	1.48298e+06	470234	856017	1.01774e+06	1.8153e+06	1.74681e+06
	5.94	618118	651318	102698	568208	687268	755308	1346241	588676	865508	1158348	1.8483e+06	1.71607e+06
	6.14	721998	604400	98075.6	543280	616876	751111	1.29556e+06	632250	860590	1226589	1.81572e+06	1.7845e+06
	6.35	671984	528342	113044	522136	600484	756054	1264275	559186	763287	1.19881e+06	1.71378e+06	1.76985e+06
	6.55	588116	440472	154311	499332	552636	859482	1.13723e+06	472457	624717	1.14704e+06	1.68094e+06	1.77646e+06
	6.76	602926	361825	219932	461508	452254	808004	964240	432503	498882	1.12105e+06	1.42905e+06	1688746
	6.96	503876	313375	121620	388916	396678	750442	863072	373106	445840	944654	1.15033e+06	1.58991e+06
	7.17	455764	276875	122516	354796	371206	721066	712014	297625	437738	843880	1.01001e+06	1.528e+06
	7.37	425782	238580	161601	332496	396352	735926	593126	248700	464000	787126	1.02229e+06	1.46332e+06
	7.58	595040	220130	85256	293460	367184	746734	552284	233458	519608	772278	999943	1.48065e+06
	7.78	717778	217055	97146.8	274836	304130	735906	543500	223264	538218	776554	905660	1.54363e+06
	7.99	410958	212825	52791.2	271444	304666	717377	533222	195779	550143	756428	722336	1.6003e+06
	8.19	394110	210700	24722	291104	286784	697344	522358	179920	585828	758184	552357	1.6627e+06
	8.4	385550	198295	78030.8	276788	286452	653200	553022	196549	585981	839080	452192	1.66033e+06
	8.6	378418	186225	60264.8	272048	289028	616053	632865	211416	623158	866601	441456	1.44313e+06
	8.8	428156	199342	139040	314824	286456	529557	607784	218900	549944	788404	417894	1.19331e+06
	9.01	341446	188405	135746	287700	266048	497994	534720	222919	471231	624045	370548	1.03653e+06
	9.21	222236	181600	88960.4	291272	292678	489286	519262	233322	499263	510735	354814	1.033e+06
	9.42	208334	176212	62046.8	270224	282110	497384	519132	251686	499676	427797	412266	1.02274e+06
	9.62	322790	171440	24052.4	252512	290714	463392	560298	288491	394742	391272	412887	1.03463e+06
	9.83	394086	183375	23004.8	248108	348764	438276	538959	312252	303080	348477	501345	936878
	10.03	445836	199500	127030	228980	365064	466714	571892	350194	251271	331947	574053	816277
	10.24	347246	197200	90202.4	213584	376720	508634	615754	376420	294254	375279	670168	682365
	10.44	573326	213285	79845.2	203660	364272	549380	595666	348152	326469	372231	723794	671741
	10.65	499180	204252	42736.4	222052	374948	490889	575920	295958	366663	402950	826739	652096
	10.85	440166	193668	66809.6	200856	403998	430703	583227	249068	430071	417030	865309	584186
	11.06	539214	190620	93572	230332	370762	416698	608174	226233	507100	411621	921958	558380
	11.26	617556	222375	152756	232560	345808	420311	614144	200830	564117	393195	950142	620209
	11.47	483768	197388	109545	218476	376122	397251	595092	189945	609038	389050	846898	664494
	11.67	471922	216315	105009	232000	430104	420268	593020	171584	651290	370500	807437	599852
	11.88	429992	225975	89856.8	213648	456254	389326	626342	151976	712634	305550	956363	588654
	12.08	487704	188860	246921	212188	442920	389744	707588	144314	671697	283088	1.09317e+06	667094
	12.29	678644	212500	79856	219024	443894	421388	748503	141250	584408	280476	1.17047e+06	711897
	12.49	732078	234978	172336	220212	437724	407889	746211	143817	632013	292311	1.24408e+06	744180
	12.7	719302	215735	262462	216100	456148	397231	737382	140995	601274	294717	1.16525e+06	673484
	12.9	612160	199152	291612	221560	439174	445936	698878	141733	559410	304414	1.24185e+06	675286
	13.1	591240	185785	218539	226000	440754	391658	719704	148167	528984	355440	1.22416e+06	600217
	13.31	619796	204150	147993	226596	454332	342107	794276	153382	536217	371416	1.05039e+06	538144
	13.51	755300	179432	201108	242440	609170	381163	826276	139940	647997	396676	1.12666e+06	485202
	13.72	845796	183925	201766	230992	766778	365337	765050	138607	854184	469788	1.55838e+06	443914
	13.92	900084	194745	173298	227624	772592	384388	704102	141723	964754	479374	2.03768e+06	442675
	14.13	916574	188195	208257	235440	681788	393300	829288	148651	980103	430964	2.1758e+06	728610
	14.33	639770	193800	229749	261060	675484	391564	950565	143920	957258	400034	1.97717e+06	678545
	14.54	718786	199750	329422	242648	696384	359619	954242	132824	923172	406290	1.80288e+06	636300
	14.74	787282	188555	450534	255200	662510	377773	948915	138342	930320	508336	1.91892e+06	523908
	14.95	741210	194000	530000	266804	600974	356341	1039674	140286	980500	672860	2.00457e+06	525084
	15.15	676842	189835	669050	264328	617124	347891	1.15854e+06	134862	1.04528e+06	714693	1.93805e+06	556731
	15.36	607888	186050	951340	300192	527280	374463	1.14466e+06	123935	1.15318e+06	772628	1829396	537246
	15.56	502498	168045	1.42673e+06	297708	482264	383334	1157379	109417	1.20547e+06	878630	1.50637e+06	557600
	15.77	622954	186670	1.75535e+06	299612	580966	397362	1.12214e+06	114174	1.20789e+06	964370	1.3465e+06	585854
	15.97	507828	203772	1.84639e+06	326380	599072	374152	1.19495e+06	129154	1.06746e+06	1219977	1.62846e+06	564147
	16.18	508888	192118	1.55587e+06	351796	650910	338716	1315833	144712	961914	1.16424e+06	1.91439e+06	566054
	16.38	507586	198000	1176488	387676	590598	370723	1354266	182250	1.00721e+06	1.08475e+06	1.9943e+06	545788
	16.59	724664	211358	1.05464e+06	415864	566824	386193	1349451	238997	1.30975e+06	1053138	1.87888e+06	544313
	16.79	720170	227465	1.09102e+06	466216	671638	397360	1432341	298246	1601766	978628	1.87526e+06	626023
	17	737650	239445	1.2641e+06	451328	660220	418089	1433688	341493	1831815	1.00355e+06	2.02314e+06	705126
	17.2	824390	282060	1424348	470728	643002	431724	1253862	392392	1.98846e+06	1.18925e+06	2.03148e+06	695478
	17.4	821640	335625	1551626	435092	685164	515041	1138602	450875	2.03433e+06	1.33059e+06	1.92358e+06	810364
	17.61	846078	474035	1.43151e+06	522512	855808	574289	1104456	576532	1.92415e+06	1355130	1904731	1.04941e+06
	17.81	925758	712340	1.26729e+06	515980	1125994	621313	1.09313e+06	820267	1796274	1409304	2.045e+06	1.25277e+06
	18.02	986412	939995	1.01726e+06	597628	1415910	790717	1106829	1.11997e+06	1619259	1.34919e+06	2.09332e+06	1.32849e+06
	18.22	1117776	1.03757e+06	801674	713764	1728960	935500	1072968	1.41076e+06	1462842	1300593	2.22102e+06	1443504
	18.43	1358500	1040700	523272	864888	1913732	983011	899888	1718930	1334019	1.3774e+06	2.34881e+06	1.58944e+06
	18.63	1482092	1112615	530637	932652	1864930	1.00149e+06	621844	2.01733e+06	1294239	1.44635e+06	2099120	1.7125e+06
	18.84	1454866	1349060	551157	1039460	1859858	1.00275e+06	515410	2186099	1339167	1597017	1.81346e+06	1.77372e+06
