# Supplementary material for: CD31 signaling promotes the detachment at the uropod of extravasating neutrophils allowing their migration to sites of inflammation
Source: eLife. 2023 Aug 7;12:e84752. doi: 10.7554/eLife.84752 (PMC10431918; doi:10.7554/eLife.84752)
Supplement: Figure 3—source data 3. [file elife-84752-fig3-data3.xlsx]

## Sheet: Figure 3D
	Uropod length (µm) of WT and Pecam1-/- neutrophils migrating on laminin a4 coated surfaces
	Uropod lenght (µm)
	WT	Pecam1-/-
	8.01	7.9
	6.14	4.71
	4.68	12.96
	2.79	9.49
	3.77	8.34
	4.58	8.16
	5.06	8.69
	2.87	10.86
	2.95	12.17
	7.24	8.46
