# Supplementary material for: CD31 signaling promotes the detachment at the uropod of extravasating neutrophils allowing their migration to sites of inflammation
Source: eLife. 2023 Aug 7;12:e84752. doi: 10.7554/eLife.84752 (PMC10431918; doi:10.7554/eLife.84752)
Supplement: Figure 3—source data 4. [file elife-84752-fig3-data4.xlsx]

## Sheet: Figure 3E
	Cell area (µm^2) of WT and Pecam1-/- neutrophils migrating on laminin a4 coated surfaces
	Cell Area (µm^2)
	WT	Pecam1-/-
	122	179
	135	113
	109	94
	149	110
	136	112
	88	195
	101	207
	122	182
	176	108
	136	165
	108	189
	97	159
	75	173
	139	154
	94	137
	83	193
	141	175
	82
	68
