# Supplementary material for: CD31 signaling promotes the detachment at the uropod of extravasating neutrophils allowing their migration to sites of inflammation
Source: eLife. 2023 Aug 7;12:e84752. doi: 10.7554/eLife.84752 (PMC10431918; doi:10.7554/eLife.84752)
Supplement: Figure 3—source data 5. [file elife-84752-fig3-data5.xlsx]

## Sheet: Fig. 3F
	Quantification of mean fluorescence intensities (MFI) of CD44 (clone IM7) and SHIP-1 (clone PC1C) along the cell axis of WT neutrophils
	Distance (µm)	CD44						SHP-1
	0	55500	32042.5	29520	28923.7	30519.8	84600	39780	37900.5	85347.9	70362.6	47287.9	47344.8
	0.2	69026	32456.7	43100.2	26394.7	31896.3	74200.4	64682.4	37060	52800	67493.7	48651.9	47544.8
	0.41	57218.8	33896.3	33623.5	25254.8	28405.7	88729.2	86389.9	40885	78900	70926.5	62800.5	39862.2
	0.61	67962	37904.6	29520	26340.1	33905.3	79091.2	89605.6	49690.3	71886.9	69968.6	62360.5	40632.6
	0.82	105486	37873.3	33623.5	29424	30914.8	89395.2	122037	62475	89595.6	97140.7	55264.2	47655.2
	1.02	140275	35068.7	43100.2	26711.2	31157.8	84984	174849	70764	83194.8	69977.9	55459.8	50300
	1.23	178019	36433.7	73376.6	30080.2	35337.1	81379.6	260135	82012.4	99399.9	86654.4	59168.6	75598
	1.43	248039	47320	122076	37120	41244.6	98851.2	386057	129880	152139	118346	62591.1	141580
	1.64	320234	60324.8	210885	38149.3	47869.6	127461	486812	299811	205987	158893	74098.2	211840
	1.84	383692	91158.9	338383	43208.6	58772.6	187174	508823	648745	381314	181114	92851.4	292723
	2.05	559387	197253	461336	58573.3	82048.9	176730	600798	1.12339e+06	522813	248968	138739	404320
	2.25	867277	409153	663190	90693.4	133439	228616	961725	1.27197e+06	741217	427645	228987	504845
	2.46	1.19688e+06	868684	991019	201984	221372	259494	1.44989e+06	1.20154e+06	1.17312e+06	867972	383668	701300
	2.66	1.64897e+06	1.5007e+06	1.53765e+06	402360	421598	342366	1.9554e+06	1563150	1670352	1.83341e+06	745257	852955
	2.87	1.91501e+06	1.75665e+06	2.06046e+06	654878	811629	501317	2.21235e+06	2.03348e+06	2135568	2.0608e+06	1438580	1.18767e+06
	3.07	1.83025e+06	1.52651e+06	1.68937e+06	916422	1563250	758398	2.03629e+06	2.00273e+06	1.95592e+06	1.71362e+06	1.90196e+06	1.743e+06
	3.28	2.01106e+06	1354210	966187	1.31109e+06	2.07372e+06	1294560	2.11431e+06	1.35496e+06	1.27567e+06	1303960	1.72925e+06	1897927
	3.48	1.61822e+06	1.99036e+06	745996	1.67166e+06	1.95688e+06	2.09353e+06	1.60181e+06	915985	883641	1.14576e+06	1.31306e+06	2.06231e+06
	3.69	1.17937e+06	1.94276e+06	568389	1.94705e+06	1.443e+06	2.04011e+06	1.19762e+06	655221	719627	1.00384e+06	910048	1955019
	3.89	887810	1.73814e+06	424285	1.50783e+06	1.00814e+06	1.99075e+06	948192	491073	653548	990635	653778	1971000
	4.1	762280	1.20009e+06	387854	814887	737337	1.8997e+06	865085	465857	586864	928400	555987	1.85091e+06
	4.3	740103	706723	328299	640818	567115	1.64635e+06	869169	462469	526915	823671	535297	1.47292e+06
	4.5	822298	640683	314640	670776	528241	1.4173e+06	931483	414375	521601	728683	512875	1300897
	4.71	779796	608376	298445	535764	509551	1.38411e+06	842509	350150	536687	782648	405392	1.21451e+06
	4.91	608524	530352	289143	425782	454867	1.39771e+06	720058	328116	539208	860852	369754	1.01281e+06
	5.12	520422	463645	260102	409853	402617	1.21751e+06	599616	357850	563100	873929	371758	935309
	5.32	519672	373736	227771	402668	378199	1.08768e+06	522527	333578	496909	831684	329000	1021250
	5.53	630449	292310	205641	441335	350361	1.04537e+06	581615	287357	453765	679253	326058	1.10277e+06
	5.73	699854	339387	198595	562456	288600	1.08453e+06	584826	271575	379156	501259	310807	1.1261e+06
	5.94	650609	330532	170628	731550	285212	938151	505915	291424	294500	467715	329690	982457
	6.14	600920	301610	187028	733627	282498	887262	572174	243015	312121	507684	300626	890942
	6.35	571834	274300	190645	555600	248497	961160	681302	226440	341584	551008	300080	789510
	6.55	592365	241184	196066	385139	260390	901146	695794	231713	319439	577967	283771	764175
	6.76	592681	220309	153019	298741	228959	746822	660304	227378	272786	626897	321868	731100
	6.96	508755	188760	165567	262020	246688	607828	471846	231880	282483	613525	346520	509717
	7.17	439674	222957	180280	304009	262940	580143	421053	243257	307105	575542	347356	495973
	7.37	418380	235964	184264	391823	267455	551466	427688	242017	381534	559200	393543	488025
	7.58	402442	233307	213900	417592	294728	529560	483373	226440	428315	548612	410292	495636
	7.78	452020	225425	221415	392706	276786	516195	464732	235885	403870	559124	392320	479227
	7.99	431375	224512	195834	340039	285235	469656	402332	350849	358774	578200	341390	434065
	8.19	416798	235820	187955	263760	299099	474378	385276	533630	390872	551584	282832	481625
	8.4	466724	236398	187272	240592	291193	492898	375781	375694	456317	576622	268251	504258
	8.6	467834	271816	163638	298997	271817	493494	397619	245326	573826	609831	251683	493810
	8.8	470968	332020	168841	405016	240241	498215	486921	254943	419651	618087	226308	408506
	9.01	300798	174041	105142	307745	142471	474535	555209	297544	315347	619863	228980	395731
	9.21	314783	156441	107060	298678	137589	418045	570557	277195	286229	610864	258312	371784
	9.42	334050	173160	112514	209669	135647	394895	633118	242618	255880	680922	238515	333698
	9.62	393508	186335	109374	131671	148792	493521	599085	266012	251110	789436	250963	304800
	9.83	370053	179325	121829	123458	145960	363868	428436	397045	252975	943445	257400	284882
	10.03	340500	167908	132238	146261	169728	346000	372496	511700	242435	1.14062e+06	243346	278216
	10.24	313248	184404	131946	165809	193511	347353	301408	570885	243725	1.24532e+06	203696	270958
	10.44	292116	300699	120930	184382	160024	328111	294636	538995	252416	1.33951e+06	188210	271208
	10.65	267418	448032	120766	299976	145385	269780	289178	528190	275335	1.44934e+06	214846	266799
	10.85	250980	459848	137842	379579	145847	239375	318953	625310	239639	1.38623e+06	220554	211378
	11.06	271294	388056	143486	364746	151796	226480	422249	719692	233652	1.10439e+06	253573	195000
	11.26	313817	315822	140520	381232	170274	194903	476146	606107	236181	889124	333475	205416
	11.47	335475	368848	133124	362430	190960	236492	414737	304939	226660	734174	380219	192694
	11.67	302712	475504	133145	372106	209295	247513	355042	146609	249853	614473	389925	171871
	11.88	296723	465218	117525	359698	207099	245284	315258	70635	294776	564973	374911	135781
	12.08	321300	311876	105160	334401	193473	228643	316300	61326	365461	514743	327667	150100
	12.29	340700	148968	95428.8	341772	177050	215654	374750	40003.6	344874	494855	290600	166380
	12.49	388961	69888	116281	325643	170488	203979	372817	50093.4	374095	458927	284667	159150
	12.7	390138	45364.3	127682	265287	175020	212804	412341	46740.5	340598	490770	298655	160223
	12.9	379278	30138.3	130012	222499	181854	176620	416384	43406.6	363755	490675	300091	174665
	13.1	362980	24440	120340	217718	186098	157933	438560	43123.4	337336	486884	304480	203364
	13.31	350935	21694.1	119420	199257	183886	187378	491036	36921.4	306497	493204	255640	213892
	13.51	348267	18171.1	131748	195937	161070	205437	420501	35970.8	306862	513650	173127	233686
	13.72	305489	17667	130602	211550	89712.2	205083	369606	31280	295427	500675	75290.2	223886
	13.92	279135	17648.2	119921	236806	47121.8	252084	378475	37570	280409	450855	51268.4	217500
	14.13	249412	18408	118582	249619	26589.7	203193	381157	33382.9	298308	432763	50905.4	215799
	14.33	223745	16068	115408	237776	20371.7	261425	360692	49532.9	297958	488224	44533.7	229883
	14.54	208147	21528	111470	230189	18974.7	320067	339869	39921.6	275194	492326	47064.8	202065
	14.74	190763	18552.5	104660	236272	19534	365215	301139	34881.4	328111	456522	45988.4	213515
	14.95	190532	17648.2	100207	233638	19802.8	386340	297741	33382.9	335236	465478	52222.3	322471
	15.15	205387	18408	106983	223195	19693.5	487515	324205	49532.9	329547	357635	56223.4	616442
	15.36	261470	16068	129879	139268	16808.8	578376	434704	39921.6	333196	164073	47236.9	742500
	15.56	319818	21528	160290	67953.6	15740.1	619952	559558	34881.4	321970	81489.2	48104.5	707352
