# Supplementary material for: CD31 signaling promotes the detachment at the uropod of extravasating neutrophils allowing their migration to sites of inflammation
Source: eLife. 2023 Aug 7;12:e84752. doi: 10.7554/eLife.84752 (PMC10431918; doi:10.7554/eLife.84752)
Supplement: Figure 3—source data 6. [file elife-84752-fig3-data6.xlsx]

## Sheet: Fig. 3G
	Quantification of mean fluorescence intensities (MFI) of CD44 (clone IM7) and SHIP-1 (clone PC1C) along the cell axis of Pecam1-/- neutrophils
	Distance (µm)	CD44						SHIP1
	0	63333.3	106654	135200	236000	54642.9	118333	100800	93101.5	84166.7	102941	67777.8	91666.7
	0.2	64008.3	117892	150828	166009	71148.2	99413.3	105852	106156	97557.1	102989	87957.8	125267
	0.41	68634.3	133786	149252	147766	61582.9	101679	113362	113000	108840	102231	111068	109026
	0.61	70404.3	131898	135427	156369	56862.1	127859	117832	116058	106467	118461	105416	139874
	0.82	76705.7	124253	163758	143681	73426.8	138096	116528	107033	110747	138011	108599	134485
	1.02	91561	129556	172014	231383	61172.5	170324	127628	104313	106181	215879	93082.2	178642
	1.23	74010	151277	139681	352079	71720.4	304701	107555	98982.5	115365	351379	92051.7	370637
	1.43	79789	137004	219896	681780	82503.9	616623	116643	103678	201155	652293	109707	896948
	1.64	119198	122007	326001	996796	130884	1.12261e+06	134731	112995	310189	893368	133924	1.81755e+06
	1.84	172234	124305	476182	1456705	275740	1.38921e+06	153619	108413	554956	1.23934e+06	264286	2.01596e+06
	2.05	189627	173503	755014	1531166	578811	1.35989e+06	174786	125889	1.1722e+06	1.44766e+06	548960	2.01997e+06
	2.25	219630	171837	1.13098e+06	1528595	946425	1431885	162673	168135	1809630	1.64139e+06	954450	2.04323e+06
	2.46	403957	177888	1.22421e+06	1670120	1.2185e+06	1.47722e+06	331508	199960	1.67973e+06	1.98076e+06	1.1453e+06	1.85761e+06
	2.66	759914	146483	1.30954e+06	1603494	1.26709e+06	1.55072e+06	903315	325988	1.52644e+06	1.79871e+06	1.01577e+06	1.96586e+06
	2.87	1427245	227655	1266188	1586854	1.20914e+06	1.80935e+06	1.83291e+06	443504	1.7692e+06	1.59958e+06	992079	2.17372e+06
	3.07	1.89893e+06	579714	1487388	1481628	1.20534e+06	1.86276e+06	1.96589e+06	1074417	1.92479e+06	1.54138e+06	963273	2.11428e+06
	3.28	1.58216e+06	1.28945e+06	1647328	1357758	1.37852e+06	1.37829e+06	1.65339e+06	1753817	1.95895e+06	1.45792e+06	1234945	1.7559e+06
	3.48	1348953	1.30579e+06	1825984	1404365	1.35186e+06	1.24778e+06	1.33458e+06	1721521	1.77317e+06	1.38415e+06	1.30444e+06	1.63508e+06
	3.69	1.18172e+06	1.47763e+06	2.07885e+06	1471343	998961	1.16742e+06	1.1842e+06	1876621	1.89125e+06	1.47663e+06	1.23366e+06	1836835
	3.89	1.09478e+06	1.58628e+06	2.13519e+06	1640426	705942	1.21272e+06	1060605	1.94183e+06	2.05509e+06	1.56927e+06	990532	1.88943e+06
	4.1	1.01315e+06	1.64261e+06	1.831e+06	1566614	574283	1.31135e+06	1.05326e+06	1796632	1.75714e+06	1.48654e+06	772392	2.06082e+06
	4.3	1.08571e+06	1.67606e+06	1.82027e+06	1616610	487355	1.28446e+06	1.18757e+06	1535422	1.75115e+06	1.36421e+06	617880	1.81338e+06
	4.5	1258452	1.79142e+06	2.069e+06	1596310	511973	1.21965e+06	1.58512e+06	1.38547e+06	1.69177e+06	1.45886e+06	602463	2.20964e+06
	4.71	1585383	2.0946e+06	1.8252e+06	1662639	612701	1.11254e+06	1.78095e+06	1.17016e+06	1.76708e+06	1.42564e+06	659062	1.80232e+06
	4.91	1.6623e+06	2.08509e+06	1.38188e+06	1771388	525277	1179775	1.87229e+06	1.17316e+06	1.74167e+06	1.22611e+06	649536	2.10697e+06
	5.12	1366676	1684620	1.46279e+06	1967552	537932	1.44205e+06	1.69937e+06	1.33206e+06	1.41576e+06	1.38806e+06	648216	1954705
	5.32	1.22828e+06	1.31274e+06	1.34205e+06	1981095	593609	1.39538e+06	1.52773e+06	1444002	1.2558e+06	1.53409e+06	604816	1.76412e+06
	5.53	1.18473e+06	1.25821e+06	1.16034e+06	1977585	509835	1.18609e+06	1418200	1.34656e+06	1.24355e+06	1.7493e+06	500028	1.56829e+06
	5.73	952939	1.30573e+06	1.08318e+06	2290690	417951	1224170	1.33753e+06	1.10579e+06	1.12493e+06	1.88718e+06	546473	1563675
	5.94	884437	1.14162e+06	1.08043e+06	2113345	489671	1.56497e+06	1.37009e+06	1.07753e+06	1.06721e+06	1.89804e+06	607074	1.83203e+06
	6.14	989548	1190077	1251344	1858016	642358	1.76042e+06	1.38712e+06	1.23271e+06	1.17349e+06	1.83967e+06	786661	2.01874e+06
	6.35	1074264	1.09435e+06	1.21222e+06	1735789	765483	2.16884e+06	1220982	1054343	1.15142e+06	1.57506e+06	845381	2.09838e+06
	6.55	1.0243e+06	913215	1.14827e+06	1528646	791765	1.78263e+06	1.1176e+06	958438	1.03145e+06	1.25547e+06	777228	2.0707e+06
	6.76	916183	873680	1158896	1401545	765969	1.49024e+06	1.1185e+06	894794	1.01829e+06	1010400	957208	2102275
	6.96	864383	838671	1256352	1242485	697827	1.34903e+06	1.11304e+06	928988	1.18307e+06	1.02486e+06	923382	2.1872e+06
	7.17	956340	675716	1.22921e+06	1331525	715904	1.29247e+06	1.09757e+06	919787	1.19469e+06	1.1876e+06	811631	2.08689e+06
	7.37	927282	663013	1.20619e+06	1581338	675350	1333040	1.02934e+06	848148	1.08578e+06	1.47724e+06	805413	2.00199e+06
	7.58	794851	666233	1058052	1725741	644332	1.2079e+06	910454	807158	911491	1.66928e+06	769333	1.97897e+06
	7.78	621443	656086	1.29321e+06	1719523	737550	1.25737e+06	773686	681686	906730	1.89108e+06	967283	2.0187e+06
	7.99	539570	654901	1.19771e+06	1716253	804827	1.15781e+06	895090	661674	1.03133e+06	1.86563e+06	1.20904e+06	1.7942e+06
	8.19	652482	624168	1.18305e+06	1557592	1188555	1.06143e+06	1.14477e+06	741518	1.12733e+06	1.47138e+06	1.07859e+06	1.80622e+06
	8.4	737536	699080	1.19268e+06	1691139	1.14541e+06	959494	1094814	830507	1.09006e+06	1.58443e+06	969217	1.63092e+06
	8.6	712599	723435	1.0985e+06	1729061	1.07966e+06	1.01529e+06	959043	865514	993006	1.69042e+06	862556	1.54612e+06
	8.8	693889	732658	1.06115e+06	1921279	1.03589e+06	1.07606e+06	920464	882290	1.01826e+06	1.99625e+06	867497	1.4818e+06
	9.01	732807	946050	1.03685e+06	2000627	907321	982503	926214	990500	1.02076e+06	1.95938e+06	805037	1.471e+06
	9.21	690893	1.24174e+06	1.07345e+06	2089248	779976	1.02265e+06	1.15759e+06	1241348	1.02762e+06	2.18348e+06	715033	1.49916e+06
	9.42	647481	1.32429e+06	1.04519e+06	2140054	755435	1012185	1.08399e+06	1389634	953959	2.19587e+06	703226	1.57825e+06
	9.62	685832	1.22218e+06	1.01636e+06	2213189	787756	847297	1.02092e+06	1.32718e+06	787520	2.19626e+06	726524	1.3255e+06
	9.83	646289	1.13308e+06	960199	2423766	802931	749888	1.03786e+06	1.24123e+06	848090	2.37994e+06	785919	1.01625e+06
	10.03	511333	1.0438e+06	971227	2325616	935180	717110	1099700	1018341	755149	2.34385e+06	804186	997987
	10.24	603565	905225	814826	2189570	1.11435e+06	718289	1.02792e+06	1.01929e+06	778182	1.95969e+06	965877	929462
	10.44	662758	881461	946624	2020152	1.40566e+06	619008	1.02749e+06	952307	907517	1.73127e+06	1.28541e+06	761709
	10.65	677843	781652	968890	2017412	1.5716e+06	612921	973685	823873	955828	1.71517e+06	1.383e+06	700880
	10.85	623621	722555	972104	2226250	1962170	531186	778511	766454	946298	1707500	1.89875e+06	721493
	11.06	579008	752329	1.04895e+06	2201144	2.31332e+06	627641	721601	903955	945599	1.61773e+06	1.87287e+06	708923
	11.26	630174	1.05812e+06	1.12988e+06	2167998	1.74837e+06	574925	762358	871564	999978	1.60727e+06	1.43868e+06	699920
	11.47	677837	1.13602e+06	1.07264e+06	1820036	1.53012e+06	771835	750943	995761	1.1389e+06	1.46687e+06	1.22938e+06	577673
	11.67	688718	1.13e+06	1224512	1593071	1430435	676279	744142	1037638	1.17007e+06	1.26936e+06	1.08043e+06	662177
	11.88	614832	967676	1291944	1467566	1242715	798439	888294	1199859	859917	1.40974e+06	851154	699438
	12.08	712679	976563	1259424	1686731	699552	1.07032e+06	1.00439e+06	1254879	679732	1.39682e+06	499434	890824
	12.29	987879	999550	1007452	1771751	327163	1.16061e+06	1227905	1105999	767754	1.49752e+06	287498	908095
	12.49	1.10009e+06	1.07046e+06	898338	1710206	199018	1.1271e+06	1164282	952778	791057	1.30166e+06	173720	854757
	12.7	1013736	1.00891e+06	790130	1784612	135317	1.15014e+06	1032479	910523	767415	1.0822e+06	119468	881732
	12.9	819102	1.09113e+06	723965	1536761	76377.9	1271960	882872	1066441	791650	963616	94557.2	941241
	13.1	705489	1.5099e+06	671954	1425202	77860	1.37121e+06	762365	1.26356e+06	785166	920069	97461.7	1.02493e+06
	13.31	687251	1.61495e+06	695881	1574147	64150.7	1.47492e+06	660577	1.42407e+06	819217	1.22671e+06	100368	1.25807e+06
	13.51	646867	1.40664e+06	969713	1713128	80423.6	1271885	743758	1420657	1.0547e+06	1.42033e+06	91223.3	1.33264e+06
	13.72	538038	1.29985e+06	1.13083e+06	1638257	50714.3	1.12878e+06	942406	1.53109e+06	1.3438e+06	1.25878e+06	74444.4	1.36374e+06
	13.92	509717	1.28057e+06	1026912	1786273		1.06713e+06	932170	1.46961e+06	912583	1.23407e+06		1.54258e+06
	14.13	550736	1.05127e+06	586784	1940473		980862	1.00421e+06	1249552	496003	1.22869e+06		1.43416e+06
	14.33	531224	931178	344709	1780014		714969	1.09906e+06	1170247	310645	1.23562e+06		1.3433e+06
	14.54	602731	856274	224576	1979759		384719	1.08765e+06	1105922	197415	1.17887e+06		752186
	14.74	598472	809514	132304	1708726		206554	1.06401e+06	1.11429e+06	124679	1.20007e+06		236082
	14.95	551652	789823	135534	1509758		132072	937783	1070428	118150	1.24779e+06		166423
	15.15	461470	793610	128273	1333377		120805	787933	1.06455e+06	107689	1.15287e+06		155314
	15.36	527132	871146	148531	1132005		107828	816057	1.07915e+06	95160	1.0907e+06		90370
	15.56	680456	1.00646e+06	161315	1024933		106411	887921	1305372	92186.2	1.15168e+06		109429
	15.77	766592	1.19928e+06	158374	1118420		92733.9	868972	1.47371e+06	82079.6	1.10224e+06		87017.9
	15.97	639925	864111	138717	1097973		111180	787414	841403	82020.8	1.01036e+06		97270.4
	16.18	525948	751839	126968	1040118		119369	449143	711399	77018.8	821163		105698
	16.38	271874	753633	136905	1039340		105056	301308	600648	81836.7	836752		85810
	16.59	138135	485272	118182	1051251		76130	182780	354546	69908.8	918191		79297.9
	16.79	92728	267607	131613	1066993		98352.2	167426	255456	66645.4	924294		95182.5
	17	107491	204884	127905	1027033		84388.3	179838	200495	69176.7	931391		66844.6
	17.2	91836.7	169047	107478	1036171		97771.7	115900	147064	67577.5	912215		63675
	17.4	93623.3	138188	126400	1059784		97147.2	124283	118476	73750	966496		71872.5
	17.61	93237.7	131413		1286199		64038.9	134302	101764		1.10301e+06		73235
	17.81	96624.7	136154		1434321		98726.7	141283	88145.5		1.15428e+06		86797.9
	18.02	85507.3	135534		1606938		79575.6	149260	97738		1.25838e+06		110716
	18.22	78200.7	129905		1520174		72222.2	117146	100976		1.26882e+06		70833.3
	18.43	69426	130013		1445071			116164	97600		1.18134e+06
	18.63	66319.7	104894		1142956			106485	91757		1.12824e+06
	18.84	75817	115926		1130464			97624.8	83472		1.14454e+06
	19.04	58164.7	117437		1113444			103134	97257		956392
	19.25	61198	93683.8		1037195			102579	83943		736674
	19.45	62697.3	95200		880647			119085	127500		485578
	19.66	61225.7			528032			114162			268561
	19.86	59015.7			270662			131828			163190
	20.07	63000			214842			98000			110654
