# Supplementary material for: CD31 signaling promotes the detachment at the uropod of extravasating neutrophils allowing their migration to sites of inflammation
Source: eLife. 2023 Aug 7;12:e84752. doi: 10.7554/eLife.84752 (PMC10431918; doi:10.7554/eLife.84752)
Supplement: Figure 3—source data 7. [file elife-84752-fig3-data7.xlsx]

## Sheet: Figure 3H
	Quantification of mean fluorescence intensities (MFI) of polymerized F-actin (phalloidin) and Talin (polyclonal ab71333) along the cell axis of WT Pecam1ITIM-/- neutrophils
	Distance (µm)	F-actin	Talin
	0	7.959	0
	0.2	8.404	0
	0.4	8.278	0
	0.6	8.713	0
	0.8	9.197	0
	1	9.71	0
	1.2	10.096	0
	1.4	10.546	0
	1.6	11.171	0
	1.8	12.152	0
	2	13.636	0
	2.2	14.781	0
	2.4	14.84	0
	2.6	15.589	0
	2.8	17.349	0
	3	18.18	0.066
	3.2	19.492	1.29
	3.4	20.714	0.658
	3.6	22.789	0.384
	3.8	25.612	0.488
	4	31.939	1.514
	4.2	39.399	7.881
	4.4	44.968	23.155
	4.6	47.881	34.977
	4.8	51.274	47.739
	5	59.181	59.464
	5.2	68.696	80.561
	5.4	78.092	122.521
	5.6	90.052	165.678
	5.8	103.548	188.041
	6	112.621	214.833
	6.2	121.016	216.536
	6.4	128.509	223.902
	6.6	136.125	225.648
	6.8	130.813	227.713
	7	123.769	223.522
	7.2	122.19	237.2
	7.4	133.292	239.223
	7.6	136.678	227.558
	7.8	131.519	221.7
	8	122.237	220.238
	8.2	109.065	219.647
	8.4	90.784	226.123
	8.6	75.963	216.98
	8.8	67.764	208.82
	9	61.087	195.988
	9.2	53.989	150.45
	9.4	49.315	133.54
	9.6	48.108	160.631
	9.8	49.556	184.21
	10	52.453	178.958
	10.2	56.409	154.814
	10.4	61.315	148.12
	10.6	60.807	144.651
	10.8	58.06	141.835
	11	56.956	127.748
	11.2	58.77	109.575
	11.4	61.276	100.119
	11.6	66.727	115.099
	11.8	64.927	126.906
	12	58.792	125.049
	12.2	59.643	124.75
	12.4	67.696	140.582
	12.6	71.948	136.081
	12.8	62.75	115.237
	13	51.283	87.866
	13.2	40.96	67.372
	13.4	32.199	58.871
	13.6	29.413	58.292
	13.8	28.133	60.88
	14	28.103	54.956
	14.2	27.417	47.615
	14.4	26.83	39.885
	14.6	25.668	25.729
	14.8	24.711	12.218
	15	24.571	13.002
	15.2	24.374	19.574
	15.4	23.733	17.641
	15.6	24.074	7.7
	15.8	24.28	2.829
	16	23.958	4.702
	16.2	24.099	12.767
	16.4	24.572	19.623
	16.6	24.141	16.905
	16.8	26.61	12.923
	17	29.551	12.017
	17.2	32.375	8.226
	17.4	33.564	6.15
	17.6	36.037	8.875
	17.8	36.005	7.411
	18	36.996	8.732
	18.2	37.596	14.098
	18.4	37.223	16.433
	18.6	35.618	12.53
	18.8	38.283	8.319
	19	45.609	6.301
	19.2	54.511	4.28
	19.4	57.651	2.838
	19.6	56.068	4.806
	19.8	55.587	3.66
	20	53.49	1.666
	20.2	52.851	3.609
	20.4	55.893	4.042
	20.6	58.532	0.858
	20.8	61.333	1.089
	21	65.693	1.776
	21.2	67.638	2.787
	21.4	70.518	2.885
	21.6	76.475	0.899
	21.8	93.037	0.975
	22	117.066	5.591
	22.2	137.932	9.738
	22.4	138.496	7.495
	22.6	131.868	2.318
	22.8	126.633	0.323
	23	118.252	0.022
	23.2	109.44	0.144
	23.4	102.409	0.005
	23.6	101.204	0.141
	23.8	96.406	0.611
	24	89.607	1.274
	24.2	79.406	2.59
	24.4	68.07	3.703
	24.6	67.474	2.613
	24.8	69.715	3.368
	25	67.362	1.593
	25.2	61.992	1.023
	25.4	59.204	6.015
	25.6	64.588	8.525
	25.8	76.144	6.488
	26	83.192	7.279
	26.2	76.192	5.965
	26.4	68.961	3.029
	26.6	65.34	0.699
	26.8	61.506	0.552
	27	61.579	0.678
	27.2	63.314	2.243
	27.4	66.764	4.107
	27.6	71.027	3.702
	27.8	74.666	2.706
	28	78.555	7.802
	28.2	77.444	11.781
	28.4	75.308	6.462
	28.6	72.413	3.001
	28.8	71.339	6.429
	29	67.893	14.347
	29.2	66.005	20.305
	29.4	67.527	16.596
	29.6	74.209	5.982
	29.8	83.384	5.016
	30	96.139	6.671
	30.2	107.981	18.803
	30.4	116.65	49.929
	30.6	131.125	62.009
	30.8	150.886	58.836
	31	172.491	36.87
	31.2	195.355	27.46
	31.4	218.032	33.117
	31.6	232.418	45.592
	31.8	246.284	56.028
	32	253.129	44.966
	32.2	253.746	32.145
	32.4	253.996	33.63
	32.6	254	41.327
	32.8	253.837	48.422
	33	253.719	58.367
	33.2	251.801	48.487
	33.4	233.05	36.088
	33.6	196.297	22.345
	33.8	166.385	12.014
	34	133.254	13.954
	34.2	105.689	16.314
	34.4	71.278	6.545
	34.6	33.394	0.165
	34.8	22.805	0
	35	20.738	0
	35.2	19.881	0
	35.4	19.577	0
