# Supplementary material for: CD31 signaling promotes the detachment at the uropod of extravasating neutrophils allowing their migration to sites of inflammation
Source: eLife. 2023 Aug 7;12:e84752. doi: 10.7554/eLife.84752 (PMC10431918; doi:10.7554/eLife.84752)
Supplement: Figure 3—source data 8. [file elife-84752-fig3-data8.xlsx]

## Sheet: Figure 3I
	Quantification of mean fluorescence intensities (MFI) of polymerized F-actin (phalloidin) and Talin (polyclonal ab71333) along the cell axis of Pecam1ITIM-/- neutrophils
	Distance (µm)	F-actin	Talin
	0	19.066	0
	0.2	19.378	0
	0.4	19.6	0
	0.6	20	0
	0.8	19.957	0
	1	20.476	0
	1.2	21.299	0
	1.4	21.731	0
	1.6	22.148	0
	1.8	23.303	0
	2	23.544	0
	2.2	23.929	0
	2.4	25.36	0
	2.6	26.738	1.043
	2.8	29.285	3.543
	3	31.795	8.458
	3.2	36.408	17.859
	3.4	42.827	31.859
	3.6	51.131	39.043
	3.8	61.936	45.291
	4	74.172	45.889
	4.2	84.045	46.277
	4.4	97.808	45.775
	4.6	113.359	56.396
	4.8	123.116	74.714
	5	133.275	111.613
	5.2	145.425	145.687
	5.4	154.396	167.18
	5.6	153.414	176.384
	5.8	147.691	177.637
	6	133.224	167.789
	6.2	126.233	155.139
	6.4	122.492	129.818
	6.6	124.797	104.734
	6.8	131.631	92.518
	7	141.542	92.725
	7.2	157.372	102.033
	7.4	182.19	115.362
	7.6	210.519	127.916
	7.8	202.62	129.417
	8	196.377	116.137
	8.2	196.225	106.817
	8.4	198.329	116.407
	8.6	204.554	144.684
	8.8	213.021	166.523
	9	220.232	185.052
	9.2	222.193	200.766
	9.4	217.068	203.43
	9.6	201.229	202.67
	9.8	183.919	186.838
	10	178.399	174.095
	10.2	181.062	166.205
	10.4	181.487	154.516
	10.6	179.601	131.987
	10.8	176.056	111.834
	11	159.041	100.039
	11.2	142.904	87.433
	11.4	132.454	77.124
	11.6	124.89	72.522
	11.8	123.625	68.795
	12	124.799	73.905
	12.2	126.557	82.202
	12.4	133.243	90.194
	12.6	141.937	91.469
	12.8	147.008	93.455
	13	145.311	89.394
	13.2	137.663	82.722
	13.4	127.055	74.782
	13.6	117.312	67.949
	13.8	106.221	65.85
	14	107.053	58.803
	14.2	116.86	50.425
	14.4	130.431	44.54
	14.6	136.584	47.168
	14.8	136.039	53.743
	15	133.86	65.824
	15.2	134.467	71.1
	15.4	138.811	73.97
	15.6	134.94	76.357
	15.8	133.453	71.359
	16	141.687	67.237
	16.2	150	64.5
	16.4	143.568	61.485
	16.6	131.364	56.301
	16.8	121.179	49.47
	17	103.912	46.614
	17.2	91.891	39.285
	17.4	89.1	29.686
	17.6	88.635	22.042
	17.8	85.191	16.818
	18	83.652	14.472
	18.2	84.2	15.108
	18.4	84.275	17.549
	18.6	87.43	20.1
	18.8	89.361	23.481
	19	92.047	23.638
	19.2	87.685	18.067
	19.4	83.686	15.274
	19.6	79.668	14.514
	19.8	78.887	14.065
	20	80.358	13.056
	20.2	77.196	11.247
	20.4	76.461	10.387
	20.6	74.715	12.314
	20.8	74.773	10.349
	21	73.902	8.236
	21.2	71.679	7.623
	21.4	71.217	6.941
	21.6	69.993	8.148
	21.8	68.305	8.2
	22	67.121	7.755
	22.2	64.743	5.836
	22.4	61.983	4.122
	22.6	62.466	2.728
	22.8	59.931	2.8
	23	59.377	5.621
	23.2	58.209	4.635
	23.4	57.376	2.101
	23.6	56.468	1.87
	23.8	55.306	2.222
	24	54.495	1.771
	24.2	52.999	1.859
	24.4	51.826	1.807
	24.6	52.649	0.971
	24.8	50.405	1.074
	25	49.519	0.466
	25.2	50.56	0.101
	25.4	50.651	0.957
	25.6	49.933	4.427
	25.8	52.431	8.326
	26	56.84	9.169
	26.2	66.542	6.739
	26.4	84.686	6.157
	26.6	97.239	11.133
	26.8	97.283	15.429
	27	87.064	15.464
	27.2	77.201	17.558
	27.4	74.281	19.359
	27.6	77.592	19.711
	27.8	82.755	15.716
	28	91.89	10.453
	28.2	110.664	11.573
	28.4	127.709	21.605
	28.6	142.866	44.653
	28.8	138.634	66.369
	29	127.055	68.002
	29.2	116.371	51.912
	29.4	111.52	37.821
	29.6	113.755	38.799
	29.8	120.888	44.208
	30	123.37	54.823
	30.2	116.663	66.176
	30.4	104.75	63.035
	30.6	93.341	48.021
	30.8	83.107	39.148
	31	81.733	31.905
	31.2	77.349	25.54
	31.4	71.747	20.947
	31.6	61.54	18.897
	31.8	49.498	20.868
	32	43.568	18.597
	32.2	41.702	7.903
	32.4	41.303	2.423
	32.6	41.926	3.021
	32.8	41.988	6.027
	33	42.624	9.141
	33.2	45.193	9.11
	33.4	51.241	7.541
	33.6	62.359	5.755
	33.8	72.505	3.467
	34	82.27	2.475
	34.2	93.042	7.996
	34.4	114.446	15.566
	34.6	137.507	25.63
	34.8	146.514	36.71
	35	140.103	46.681
	35.2	114.015	53.539
	35.4	89.226	43.908
	35.6	82.302	26.102
	35.8	91.735	27.241
	36	110.411	40.249
	36.2	141.329	54.728
	36.4	185.954	59.38
	36.6	216.743	80.968
	36.8	231.821	107.794
	37	199.417	103.744
	37.2	114.616	58.162
	37.4	53.863	16.675
	37.6	27.111	0.942
	37.8	20.243	0
	38	18.393	0
	38.2	17.882	0
	38.4	17.223	0
	38.6	16.985	0
	38.8	16.966	0
	39	16.421	0
	39.2	16.717	0
	39.4	16.426	0
	39.6	16.162	0
	39.8	15.832	0
	40	15.873	0
	40.2	16.208	0
	40.4	16.102	0
	40.6	15.888	0
	40.8	15.83	0
	41	16.284	0
	41.2	16.431	0
	41.4	16.271	0
	41.6	15.841	0
	41.8	15.794	0
	42	16.049	0
	42.2	15.699	0
	42.4	15.792	0
