# Supplementary material for: CD31 signaling promotes the detachment at the uropod of extravasating neutrophils allowing their migration to sites of inflammation
Source: eLife. 2023 Aug 7;12:e84752. doi: 10.7554/eLife.84752 (PMC10431918; doi:10.7554/eLife.84752)
Supplement: Figure 3—source data 10. [file elife-84752-fig3-data10.xlsx]

## Sheet: Figure 3K
	Quantification of polymerized F-actin (phalloidin) and Talin (polyclonal ab71333) ratio at the uropod of WT and Pecam1ITIM-/- neutrophils
	Talin/F-actin ratio
	Pecam1ITIM+/+	Pecam1ITIM-/-
	1.47502	1.50069
	2.59132	1.71287
	4.1822	0.0798838
	0.540877	1.88122
	3.17734	0.661333
	1.27169	1.62691
	2.82778	2.76485
	1.77203	3.48446
	2.2553	2.6723
	0.287877	0.800414
	2.72236	0.0365916
	2.04151	0.915792
	1.76563	1.50963
	0.571212	0.268509
	1.26536	0.418729
	0.635941	0.0974171
	2.08957	0.578225
	2.33557	0.50833
	3.12203	0.567233
	1.18112	0.910921
	0.907675	1.06605
	1.3303	0.613077
	0.742363	1.12579
	1.43649	0.91967
	1.04603	1.13443
	1.59412	0.926413
	1.27525	1.3571
	1.0557	0.165233
	1.76733	0.0155378
	2.91821	2.24278
	1.39797	0.922121
	1.83109	1.03573
	1.73917	1.76598
	2.91351	2.50445
	1.77766	1.49306
	1.40165	1.55389
	1.31276	0.796878
	1.83119	1.64224
	0.684215	0.756453
	1.76869	2.23404
	3.35803	1.1522
	1.93591	1.93256
	1.41949	0.893976
	1.36503	2.14977
	1.89057	1.4679
	2.42266	0.296191
	1.81094	0.262603
	1.75571	1.06717
	1.88679	0.677272
	1.66208	1.16574
	2.80766	2.17177
	1.98065
	2.17892
	0.81987
	0.811894
	0.521497
	2.18824
	0.460955
	4.03167
