# Supplementary material for: CD31 signaling promotes the detachment at the uropod of extravasating neutrophils allowing their migration to sites of inflammation
Source: eLife. 2023 Aug 7;12:e84752. doi: 10.7554/eLife.84752 (PMC10431918; doi:10.7554/eLife.84752)
Supplement: Figure 4—figure supplement 1—source data 4. [file elife-84752-fig4-figsupp1-data4.xlsx]

## Sheet: Figure 4-figure supplement 1E
	Quantification of actin polymerization (Phalloidin staining) upon fMLP challenging the presence or absence of CD31agonist
	Time [min]	Phalloidin MFI (Fold-Change)
		fMLP			fMLP+CD31agonist
	0	0.9257	1.1331	0.9412	0.9867	0.8644	1.1489
	1	1.4464	1.3937	1.5345	1.9715	1.9803	1.8305
	2	1.3229	1.3725	1.4495	1.908	1.8995	1.9204
	3	1.32	1.3142	1.415	1.9121	1.8264	1.8264
	4	1.3906	1.3518	1.3343	1.9248	1.8506	1.8706
	5	1.2161	1.264	1.4275	1.933	1.9374	2.0421
	10	1.1902	1.0746	1.0701	1.5271	1.5669	1.6967
	20	0.6408	0.6562	0.7255	0.9988	1.0318	1.1503
