# Supplementary material for: CD31 signaling promotes the detachment at the uropod of extravasating neutrophils allowing their migration to sites of inflammation
Source: eLife. 2023 Aug 7;12:e84752. doi: 10.7554/eLife.84752 (PMC10431918; doi:10.7554/eLife.84752)
Supplement: Figure 4—source data 1. [file elife-84752-fig4-data1.xlsx]

## Sheet: Figure 4C
	Detachment speed of neutrophils egressing from the postacpillary venules 1 hour after IL1b challenge in the ear pinna of Lyz2-GFP mice treated or not with CD31agonist
	Speed (µm/min)
	vehicle	CD31agonist
	0.271872	1.16132
	0.689831	1.31101
	0.796794	2.3232
	0.819309	2.41569
	0.975658	2.49116
	1.01716	4.31431
	1.23732	4.84215
	1.48267	4.84503
	2.03266	5.09506
	2.54126	5.25497
	2.56747	5.83814
	2.96948	5.92229
	3.03859	6.71393
	3.2878	6.71741
	3.5029	7.30923
	3.55926	7.34387
	4.13696	7.34896
	4.34833	7.36879
	4.39401	7.4416
	4.84956	7.48721
	5.54513	7.71956
	6.30568	7.72861
	6.33867	7.75124
	6.91564	7.93056
	7.05842	7.95631
	7.31061	8.18375
	9.27895	8.33426
	10.286	8.41432
	11.4323	8.64717
	12.564	8.93931
	13.9877	9.2039
	22.736	9.23429
	25.805	9.26137
	25.9185	9.32351
		9.52183
		9.57197
		9.59236
		9.73966
		9.83702
		9.83731
		9.90696
		10.0662
		10.0809
		10.1515
		10.298
		10.3091
		10.4701
		10.5424
		10.7126
		10.7582
		10.7833
		10.7858
		10.8074
		10.9772
		11.1355
		11.1551
		11.4518
		11.7161
		12.0509
		12.1146
		12.1646
		12.4125
		12.5737
		12.6076
		12.6184
		12.9432
		13.1147
		13.3513
		13.4033
		13.4433
		13.5024
		13.582
		13.6413
		13.704
		14.0793
		15.0799
		15.1745
		15.234
		15.2918
		15.3285
		15.5782
		15.5799
		15.9847
		16.94
		17.1801
		18.962
		19.0185
		21.2705
		21.9215
		23.0031
		30.8459
		31.9364
