# Supplementary material for: CD31 signaling promotes the detachment at the uropod of extravasating neutrophils allowing their migration to sites of inflammation
Source: eLife. 2023 Aug 7;12:e84752. doi: 10.7554/eLife.84752 (PMC10431918; doi:10.7554/eLife.84752)
Supplement: Figure 4—source data 2. [file elife-84752-fig4-data2.xlsx]

## Sheet: Figure 4F
	Migratory speed of neutrophils 3 hour after IL1b challenge in the ear pinna of Lyz2-GFP mice treated or not with CD31agonist
	Speed (µm/min)
	vehicle	CD31agonist
	0.000339	1.698
	2.171	1.793
	1.728	1.776
	1.573	2.394
	8.771	2.498
	0.000623	3.015
	2.408	2.428
	0.000493	1.612
	1.931	3.447
	0.000657	2.038
	0.000316	1.772
	0.00018	3.536
	0.000195	2.267
	0.000355	2.617
	2.822	3.327
	1.085	2.728
	3.397	2.328
	0.000799	2.802
	0.000962	4.347
	0.000777	2.159
	3.104	2.53
	2.203	2.186
	0.000904	3.147
	1.444	1.141
	1.534	2.099
	2.581	3.971
	0.000279	4.525
	0.000429	1.991
	1.917	2.005
	2.209	1.795
	1.344	2.975
	2.616	4.401
	1.031	3.33
	1.597	1.132
	0.000725	5.163
	1.169	3.579
	1.736	2.159
	1.265	2.057
	0.000933	7.705
	0.000324	4.322
	2.227	2.721
	2.089	7.438
	0.000975	6.23
	3.452	2.893
	2.927	11.097
	2.877	1.848
	14.505	3.735
	2.9	2.504
	0.000669	9.725
	1.535	2.357
	2.837	3.956
	1.3	2.126
	3.438	2.041
	5.004	1.732
	2.245	2.749
	1.524	4.684
	5.941	4.22
	2.336	2.621
	0.000127	2.516
	0.000947	1.617
	1.906	2.339
	0.000718	6.238
	3.924	2.685
	2.542	2.821
	0.000188	1.589
	4.579	3.072
	0.000259	2.693
	0.00021	2.866
	2.934	1.945
	4.037	2.038
	2.167	3.415
	2.754	3.466
	1.225	3.041
	2.797	2.843
	3.505	4.505
	2.413	2.565
	0.00014	3.948
	0.000291	2.603
	1.266	3.538
	0.000633	2.487
	5.074	6.581
	1.039	5.225
	2.152	7.346
	0.00093	3.07
	0.000225	4.14
	2.093	3.51
	3.342	6.15
	0.000635	1.36
	0	4.09
	0.000266	2.43
	1.388	3.83
	0	4.54
	5.856	1.48
	2.571	4.59
	0.000793	3.8
	0.000568	1.9
	0.000454	2.49
	4.123	1.77
	0.000514	2.1
	0.000731	3.12
	3.646	2.03
	3.582	5.35
	5.073	2.5
	1.73	2.43
	4.104	3.14
	0.000138	2.2
	0.00031	3.93
	4.909	3.06
	1.406	4.17
	3.169	2.43
	1.244	2.35
	0.000204	3.03
	7.007	2.15
	0.000606	2.96
	4.531	2.29
	4.411	3.23
	0.000435	3.8
	1.986	2
	6.054	0
	4.438	2.02
	4.235	0
	1.882	4.31
	0.000853	5.49
	1.583	4.77
	3.391	3.15
	3.026	5.85
	0.000173	3.77
	6.556	5.07
	0.000415	2.5
	0.000219	4.51
	0.000358	5.4
	0.00028	4.16
	4.916	3.91
	0	6.44
	7.6e-05	2.01
	0.000394	3.58
	0.000771	6.03
	0.000138	3.59
	0.00022	1.31
	0.000786	2.31
	0.000446	4.38
	5.558	1.93
	0.000424	2.95
	4.339	5.04
	0.000953	5.22
	3.073	3.41
	3.906	4.17
	2.379	7.24
	0	3.97
	0.00031	4.64
	0.000934	2.01
	4.067	2.22
	5.185	3.26
	4.916	6.64
	3.146	6.72
	2.705	2.87
	4.927	2.97
	3.523	5.29
	3.167	6.71
	3.993	6.38
	2.752	4.05
	3.918	3.82
	5	1.5
	7.076	5.17
	3.894	13.83
	4.552	2.05
	4.314	1.97
	4.771	4.18
	4.061	4.08
	4.762	2.99
	3.641	4.9
	4.111	6.29
	4.015	3.53
	5.356	2.26
	0.000537	12.97
	4.879	3.66
	5.124	5.23
	0	4.98
	6.923	4.34
	3.47	1.89
	1.818	2.34
	1.262	1.62
	0.000909	2.21
	5.678	3.19
	5.187	2.11
	5.132	8.81
	4.786	3.15
	5.75	3.95
	4.049	3.83
	0.000909	1.23
	0.000783	1.19
	6.185	2.69
	0	3.02
	0.00025	26.84
	5.074	2.63
	4.233	6.51
	3.933	3.26
	2.033	4.32
	3.119	2.82
	3.964	6.04
	5.544	5.03
	0.000776	4.44
	5.167	4.2
	0.000303	5.92
	1.428	2.47
	5.188	3.16
	0.000909	1.96
	3.848	3.08
	1.437	3.58
	6.914	2.67
	0.000505	1.98
	0.000735	2.36
	3.53	1.92
	0	2.24
	12.365	6.53
	0.000909	17.53
	0.000635	4.75
	7.855	2
	1.16	3.25
	0.000517	4.27
	6.233	3.24
	0.000364	3.88
	3.702	6.28
	4.784	1.14
	0	1.57
	1.363	2.53
	1.097	4.19
	0.000227	9.66
	6.026	5.2
	3.45	5.41
	2.9
	0.000606
	0.000388
	0.000303
	6.169
	0.000909
	0.00082
	0.000455
	1.863
	5.111
	1.714
	10.985
	1.195
	0.00039
	1.355
	5.568
	0.000182
	3.649
	0.000227
	4.185
	4.418
	2.033
	0.000303
	10.967
	0.000303
	0.000455
	3.927
	3.636
	1.097
	3.049
	0.000909
