# Supplementary material for: CD31 signaling promotes the detachment at the uropod of extravasating neutrophils allowing their migration to sites of inflammation
Source: eLife. 2023 Aug 7;12:e84752. doi: 10.7554/eLife.84752 (PMC10431918; doi:10.7554/eLife.84752)
Supplement: Figure 4—source data 3. [file elife-84752-fig4-data3.xlsx]

## Sheet: Figure 4G
		Morphological parameters of neutrophils 3 hour after IL1b challeng in the ear pinna of Lyz2-GFP mice treated or not with CD31agonist
		Lenght (µm)			Circularity index
		vehicle	CD31agonist		vehicle	CD31agonist
		66	17		0.15	0.24
		42	21		0.19	0.25
		23	21		0.22	0.26
		30	16		0.22	0.28
		39	20		0.24	0.28
		35	23		0.26	0.29
		18	18		0.26	0.3
		19	23		0.26	0.31
		16	15		0.27	0.33
		30	16		0.28	0.33
		19	12		0.28	0.33
		20	18		0.29	0.34
		32	25		0.3	0.37
		37	24		0.31	0.37
		42	15		0.32	0.38
		30	16		0.33	0.39
		34	15		0.33	0.41
		41	18		0.34	0.42
		40	14		0.34	0.42
		41	15		0.35	0.43
		37	16		0.35	0.43
		25	15		0.35	0.44
		32	14		0.36	0.45
		26	17		0.37	0.45
		23	22		0.37	0.46
		20	17		0.38	0.47
		18	17		0.38	0.47
		15	16		0.39	0.47
		20	16		0.39	0.48
		23	28		0.4	0.49
		15	17		0.4	0.49
		19	13		0.4	0.5
		40	19		0.41	0.5
		31	11		0.41	0.52
		31	11		0.41	0.52
		15	14		0.41	0.53
		20	19		0.42	0.53
		35	13		0.42	0.55
		25	15		0.43	0.55
		47	14		0.43	0.55
		19	22		0.43	0.56
		38	12		0.44	0.57
		29	25		0.44	0.57
		31	19		0.45	0.58
		34	25		0.45	0.58
		29	15		0.46	0.59
		28	18		0.46	0.59
		30	19		0.46	0.6
		35	17		0.47	0.6
		19	16		0.47	0.61
		33	10		0.47	0.61
		36	21		0.48	0.62
		28	18		0.48	0.62
		19	16		0.49	0.63
		22	25		0.49	0.63
		15	18		0.5	0.63
		15	20		0.5	0.64
		15	13		0.5	0.64
		21	12		0.5	0.65
		23	16		0.51	0.67
		13	21		0.51	0.68
		17	16		0.53	0.69
		21	28		0.53	0.7
		23	27		0.54	0.71
		32	26		0.54	0.72
		36	17		0.55	0.73
		36	19		0.56	0.74
		27.042	13.9		0.57	0.74
					0.57	0.76
					0.57	0.77
					0.57	0.78
					0.58	0.79
					0.58	0.81
					0.58	0.81
					0.59	0.82
					0.59	0.84
					0.61	0.87
					0.61	0.92
					0.62	0.97
					0.63
					0.65
					0.66
					0.67
					0.68
					0.68
					0.69
					0.73
					0.75
					0.79
					0.86
					0.9
