# Supplementary material for: CD31 signaling promotes the detachment at the uropod of extravasating neutrophils allowing their migration to sites of inflammation
Source: eLife. 2023 Aug 7;12:e84752. doi: 10.7554/eLife.84752 (PMC10431918; doi:10.7554/eLife.84752)
Supplement: Figure 4—source data 4. [file elife-84752-fig4-data4.xlsx]

## Sheet: Figure 4H (left)
	Track plots of Lyz2-GFP+ cells at 3 hours after IL-1b injection treated with vehicle
	Distance (µm)	Path ID
		1	2	3	4	5	6	7	8	9	10	11	12	13	14	15	16	17	18	19	20	21	22	23	24	25	26	27	28	29	30	31	32	33	34	35	36	37	38	39	40	41	42	43	44	45	46	47	48
	0	0
	0	-0.38
	0	-0.38
	-0.38	0
	-0.76	0.76
	-0.76	1.51
	0	3.41
	2.27	6.82
	4.54	9.09
	6.44	10.6
	8.33	12.88
	9.47	14.77
	10.23	15.91
	11.36	17.42
	11.36	19.69
	10.61	21.21
	10.61	22.35
	10.98	23.1
	12.5	23.1
	14.39	23.1
	16.67	22.72
	18.56	23.1
	19.7	23.86
	20.45	23.86
	21.21	24.24
	23.48	25
	25.76	25.38
	27.65	25
	29.54	25
	30.68	25
	31.82	23.86
	0		0
	-0.38		0.38
	-0.76		1.14
	-0.38		1.89
	0		1.89
	-0.76		1.89
	-1.9		1.89
	-2.28		1.51
	-3.03		1.14
	-4.93		0.76
	-7.2		0.38
	-8.34		0
	-11.75		-2.65
	-14.4		-4.55
	-13.64		-6.44
	-13.26		-9.47
	0			0
	2.65			0
	4.55			0
	6.06			-2.27
	9.09			-5.3
	12.88			-7.2
	14.39			-8.33
	14.39			-9.09
	14.39			-9.85
	14.39			-12.12
	14.39			-14.77
	14.39			-15.91
	14.39			-17.04
	0				0
	0.38				0.38
	1.14				1.14
	0.76				1.14
	0.38				1.14
	0				1.14
	-0.38				0.76
	-0.38				-0.38
	0				0
	0.76				1.89
	1.52				3.03
	1.89				3.41
	2.27				3.79
	2.65				4.54
	3.03				6.06
	3.41				6.82
	3.41				6.82
	0					0
	0					-0.76
	-0.38					-1.89
	-0.76					-2.65
	-0.76					-3.03
	-0.76					-3.41
	-0.76					-3.03
	-0.76					-2.65
	-0.76					-2.65
	-0.76					-2.65
	-0.76					-2.65
	-0.76					-3.03
	-0.76					-3.03
	-0.76					-2.65
	-0.76					-2.65
	-0.76					-2.65
	-0.76					-3.03
	-0.38					-3.41
	0					-3.41
	0					-3.41
	-0.38					-3.41
	-0.76					-3.79
	-0.76					-4.17
	-0.76					-4.17
	-0.76					-3.79
	-0.76					-3.41
	-0.76					-3.41
	-0.76					-3.41
	-0.76					-3.41
	-0.76					-3.41
	-0.76					-3.03
	0						0
	0						-0.38
	-0.38						-0.38
	-0.76						-0.75
	-0.76						-1.51
	-0.76						-1.89
	-0.76						-1.89
	-0.76						-1.89
	-0.76						-1.89
	-0.76						-1.89
	-0.76						-1.51
	-0.76						-1.13
	-0.76						-1.13
	-0.76						-1.13
	-0.76						-1.13
	-0.76						-1.13
	-0.76						-1.13
	-0.76						-1.13
	-0.76						-0.75
	0						-0.38
	0.76						-0.38
	0.76						-0.38
	1.14						0
	2.27						0.76
	3.03						1.14
	3.03						1.14
	3.03						1.14
	3.03						1.52
	3.03						1.9
	3.03						1.9
	3.03						1.9
	0							0
	0.75							0.76
	0.75							-0.38
	0							-4.17
	-0.38							-7.58
	-0.76							-8.71
	-1.14							-9.09
	-1.14							-9.47
	-1.52							-9.85
	-1.9							-10.23
	-1.9							-10.61
	-1.9							-10.23
	-2.28							-10.23
	-3.03							-11.37
	-3.41							-12.5
	-3.41							-13.26
	-3.79							-14.02
	-4.17							-14.4
	-3.79							-14.02
	-3.41							-13.64
	-3.41							-13.26
	-3.41							-12.88
	-3.79							-13.64
	-4.17							-14.4
	-4.17							-14.02
	-3.79							-13.26
	-3.41							-12.88
	-3.41							-12.88
	-3.79							-13.26
	-4.55							-14.02
	-4.93							-14.4
	0								0
	-0.37								0.37
	0								0
	0.38								-0.38
	0.76								0
	1.14								0.37
	0.38								1.89
	0.38								2.65
	2.66								4.16
	4.55								7.19
	6.07								10.22
	8.72								14.01
	10.61								16.28
	10.61								15.9
	10.23								15.53
	10.99								17.04
	12.5								20.07
	14.4								23.48
	15.16								25.37
	15.16								25.75
	15.53								26.13
	15.16								26.51
	14.4								26.89
	14.02								28.4
	14.78								29.54
	16.67								30.3
	18.57								31.43
	20.08								31.81
	20.46								31.81
	19.7								31.43
	18.94								31.06
	0									0
	-0.76									-0.38
	-0.76									-0.76
	0.38									-0.38
	0.38									0.76
	0.38									2.65
	1.13									3.41
	2.65									6.44
	4.54									10.23
	6.06									11.37
	7.57									12.12
	0										0
	0										-0.38
	-0.38										-0.38
	-0.38										-0.76
	-0.38										-1.14
	0										-1.89
	0.76										-3.03
	1.14										-3.41
	1.52										-3.79
	1.52										-3.79
	1.14										-3.41
	1.52										-4.17
	1.9										-4.55
	1.9										-4.17
	1.9										-4.55
	1.9										-4.93
	1.9										-4.93
	1.52										-4.93
	1.14										-4.93
	1.52										-4.55
	1.9										-4.17
	1.9										-4.17
	1.9										-4.17
	1.9										-3.41
	1.52										-3.03
	1.52										-3.03
	3.03										-1.89
	4.17										-1.14
	4.17										-1.14
	4.17										-1.14
	4.17										-0.76
	0											0
	-0.38											2.65
	-0.38											3.79
	1.14											4.17
	3.03											4.55
	4.93											4.93
	7.2											5.31
	8.71											5.31
	9.85											3.41
	10.99											1.52
	12.5											0.76
	13.64											0
	14.02											0
	15.53											1.52
	17.43											3.79
	18.94											6.06
	20.46											8.71
	21.21											12.12
	21.21											17.05
	0												0
	0.76												0
	0.76												-0.37
	0												-1.13
	-0.38												-1.51
	-0.38												-1.89
	-0.38												-2.27
	-0.38												-3.03
	-0.38												-4.54
	0												-4.92
	0.38												-4.16
	0.38												-3.4
	0												-3.03
	-0.38												-3.03
	-0.38												-3.03
	-0.38												-3.03
	-0.38												-3.03
	-0.38												-3.03
	-0.38												-3.03
	-0.38												-2.65
	-0.38												-2.27
	-0.38												-2.27
	-0.76												-2.65
	-0.76												-2.65
	-0.76												-2.65
	-1.13												-2.65
	-1.13												-2.65
	-1.13												-3.03
	-1.13												-3.03
	-1.51												-3.03
	-1.89												-3.03
	0													0
	-0.38													0
	-1.14													0.75
	-1.9													0
	-2.27													-1.52
	-1.14													-1.52
	0													-1.14
	-0.38													-1.14
	-0.38													-1.52
	-0.38													-1.9
	-0.76													-1.9
	-0.76													-2.28
	-0.76													-2.28
	-0.76													-1.9
	0														0
	0														-0.38
	0														-0.76
	0														-1.14
	0														-1.52
	0														-1.9
	0														-2.28
	0														-2.66
	0														-2.66
	-0.38														-3.03
	-0.76														-3.41
	-0.76														-3.79
	-0.76														-4.17
	-0.76														-3.79
	-0.76														-3.79
	-0.76														-4.17
	-0.76														-4.17
	-0.76														-4.17
	-0.76														-4.17
	0															0
	0															-0.38
	0															-0.38
	0															-0.38
	0															-0.38
	0															-0.38
	-0.37															-0.76
	-0.75															-1.13
	-0.75															-1.13
	-0.75															-1.13
	-0.75															-1.13
	-0.75															-1.13
	-0.75															-1.51
	-0.75															-1.51
	-0.75															-1.51
	-0.75															-1.89
	-0.75															-1.51
	-0.75															-1.51
	-0.75															-1.51
	-0.75															-1.13
	-0.75															-1.13
	-0.75															-1.13
	-0.75															-1.13
	-0.75															-1.51
	-0.75															-1.89
	-0.75															-1.89
	-0.75															-1.89
	-0.75															-1.89
	-0.75															-1.89
	-0.75															-1.89
	-0.75															-1.89
	0																0
	0																-0.38
	0.38																-0.38
	0.76																-0.38
	0.76																-0.75
	0.76																-1.13
	0.76																-1.51
	0.76																-1.89
	0.76																-1.89
	0.76																-1.89
	0.76																-1.89
	0.76																-1.89
	0.76																-2.27
	0.38																-2.65
	0																-2.65
	0																-2.65
	0																-2.65
	0																-2.65
	0																-2.65
	0.38																-3.03
	0.38																-3.41
	0																-3.03
	0.38																-3.03
	0.76																-3.41
	0.76																-3.41
	0.76																-3.41
	0.76																-3.41
	0.76																-3.78
	0.76																-4.16
	0.76																-4.16
	0.76																-4.16
	0																	0
	-0.38																	-0.76
	-0.38																	-1.14
	0																	-1.14
	0																	-1.14
	0																	-1.52
	0																	-1.89
	0																	-1.89
	0																	-1.89
	-0.38																	-2.27
	-0.76																	-2.65
	-0.76																	-2.65
	-0.38																	-2.65
	-0.38																	-2.65
	-0.38																	-2.65
	0.37																	-2.65
	0.37																	-2.65
	0																	-2.65
	0																	-2.65
	-0.38																	-3.03
	-0.38																	-3.03
	0																	-2.65
	0																	-2.65
	0																	-2.65
	0																	-2.65
	0																	-2.65
	0																	-2.65
	0																	-2.65
	0.37																	-2.27
	0.37																	-2.27
	0																	-2.65
	0																		0
	-3.78																		-1.52
	-5.3																		-4.17
	-5.3																		-7.96
	-6.43																		-10.23
	-3.78																		-10.23
	0																		-9.09
	0.38																		-9.09
	0																		-9.09
	-0.37																		-9.09
	-0.37																		-9.47
	0																		-9.85
	0.38																		-9.85
	0																		-9.85
	-0.37																		-9.85
	-0.37																		-9.85
	-0.37																		-9.85
	-0.37																		-9.85
	-0.37																		-9.85
	-0.37																		-9.85
	-0.37																		-9.85
	-1.13																		-9.85
	0																			0
	-0.38																			-1.51
	-0.75																			-3.03
	-1.13																			-4.16
	-1.51																			-4.92
	-0.75																			-5.3
	-0.75																			-5.3
	-1.51																			-5.3
	-1.51																			-5.68
	-1.51																			-5.68
	-0.75																			-6.06
	0.76																			-6.44
	1.9																			-6.06
	3.03																			-5.68
	4.55																			-5.3
	6.44																			-4.54
	7.58																			-4.16
	7.96																			-3.4
	8.34																			-1.89
	8.72																			-0.37
	9.09																			0.76
	9.09																			1.52
	9.09																			2.28
	9.09																			2.66
	9.47																			2.66
	10.23																			2.28
	10.99																			1.9
	11.37																			2.28
	10.61																			3.41
	9.47																			4.55
	8.72																			5.31
	0																				0
	-1.14																				-0.76
	-1.89																				-1.13
	-2.27																				-1.89
	-3.03																				-3.79
	-3.41																				-4.92
	-3.41																				-4.92
	-3.41																				-4.92
	-3.79																				-5.68
	-4.17																				-6.44
	-4.17																				-6.82
	-4.17																				-6.82
	-4.17																				-6.44
	-4.55																				-6.44
	-4.93																				-6.44
	-4.93																				-6.44
	-4.93																				-6.06
	-2.65																				-6.06
	0.38																				-6.06
	1.51																				-5.68
	1.89																				-5.68
	2.27																				-6.06
	2.65																				-6.06
	3.03																				-5.68
	3.41																				-5.68
	3.41																				-5.68
	3.41																				-5.68
	4.17																				-5.68
	5.3																				-5.68
	5.68																				-5.68
	6.06																				-5.68
	0																					0
	-0.38																					0
	-0.76																					-0.38
	-1.13																					-1.9
	-1.13																					-3.79
	-1.13																					-4.93
	-0.76																					-6.06
	-0.76																					-6.82
	-1.13																					-6.44
	-1.13																					-6.06
	-0.76																					-6.06
	-0.38																					-6.44
	0																					-6.82
	1.52																					-6.82
	2.27																					-6.82
	1.9																					-6.82
	2.65																					-7.2
	2.65																					-7.2
	1.52																					-6.82
	1.14																					-6.82
	1.14																					-6.82
	0.76																					-6.82
	-0.76																					-6.82
	-0.76																					-6.82
	-0.38																					-6.82
	0.38																					-6.44
	1.52																					-5.68
	1.52																					-5.3
	2.27																					-5.68
	2.65																					-6.06
	2.27																					-6.06
	0																						0
	0																						-0.38
	0																						-0.38
	0																						-0.38
	0																						-0.38
	0																						-0.76
	-0.38																						-1.14
	-0.76																						-1.14
	-0.38																						-1.14
	0																						-1.14
	-0.38																						-1.14
	-0.38																						-1.14
	0																						-1.52
	0																						-1.9
	-0.38																						-1.9
	-0.76																						-1.52
	-1.51																						-0.38
	-2.65																						0.38
	-3.03																						0.38
	-2.65																						0.38
	-3.03																						0.38
	-3.41																						0.38
	-3.03																						0.38
	-3.03																						0
	0																							0
	2.28																							2.66
	3.79																							4.93
	6.06																							8.34
	7.96																							11.75
	9.09																							13.64
	11.37																							15.16
	14.78																							17.81
	17.05																							19.7
	18.19																							21.6
	20.08																							25
	22.73																							29.17
	27.28																							34.47
	31.06																							38.64
	32.58																							43.56
	32.58																							51.14
	32.58																							54.55
	32.96																							55.31
	31.44																							57.2
	30.31																							58.34
	30.69																							58.72
	31.06																							58.72
	31.06																							57.96
	29.93																							57.96
	29.17																							58.34
	29.93																							58.34
	32.2																							58.72
	36.37																							59.47
	39.4																							61.37
	40.16																							62.13
	41.29																							61.75
	0																								0
	-1.14																								0
	-1.9																								0.38
	-2.28																								1.14
	-3.79																								3.03
	-4.55																								3.03
	-3.41																								1.51
	-2.28																								1.51
	-1.9																								1.14
	-2.28																								0.76
	-1.9																								0
	-0.76																								0
	0.37																								3.41
	1.51																								8.33
	3.03																								10.23
	3.4																								12.12
	2.27																								15.53
	1.89																								18.56
	2.65																								21.59
	2.27																								23.48
	1.51																								24.24
	1.13																								25
	0.75																								26.51
	-0.38																								27.27
	-2.28																								28.03
	-4.93																								30.3
	-7.58																								31.44
	0																									0
	0.76																									-0.75
	1.14																									-1.51
	1.89																									-2.27
	2.27																									-2.65
	1.89																									-2.27
	1.89																									-2.27
	1.89																									-2.65
	2.65																									-3.03
	4.17																									-4.16
	5.68																									-5.3
	6.44																									-5.68
	6.82																									-5.68
	7.57																									-6.06
	7.57																									-6.06
	7.95																									-5.68
	8.33																									-6.06
	7.57																									-6.44
	7.2																									-6.81
	7.2																									-7.19
	7.2																									-7.19
	7.2																									-7.95
	7.2																									-9.47
	7.2																									-10.98
	7.2																									-11.74
	7.2																									-10.98
	7.57																									-9.47
	7.95																									-8.71
	8.33																									-9.09
	8.33																									-9.09
	7.95																									-8.33
	0																										0
	0																										0
	-1.52																										0
	-2.65																										-0.38
	-3.03																										-1.14
	-3.41																										-1.89
	-3.41																										-2.27
	-4.17																										-3.79
	-5.31																										-5.68
	-6.44																										-7.2
	-7.2																										-9.47
	-7.96																										-11.74
	-9.47																										-12.12
	-11.75																										-11.74
	-16.67																										-12.5
	-20.08																										-12.88
	-20.08																										-13.26
	-20.84																										-14.01
	-21.21																										-14.77
	-21.21																										-15.53
	-21.21																										-15.53
	-20.08																										-14.39
	-18.94																										-13.64
	-17.05																										-12.88
	-14.78																										-12.12
	-13.26																										-11.74
	-12.5																										-10.98
	-12.5																										-10.23
	-12.88																										-9.47
	-13.64																										-8.71
	0																											0
	-0.38																											-0.38
	0																											-0.75
	1.52																											-1.13
	1.89																											-1.51
	1.89																											-1.51
	3.03																											-2.27
	3.79																											-3.41
	3.79																											-3.41
	4.55																											-3.41
	5.3																											-4.16
	5.3																											-4.54
	5.68																											-5.3
	6.44																											-6.82
	6.44																											-7.57
	6.06																											-7.57
	6.06																											-7.57
	6.06																											-7.19
	6.44																											-6.82
	7.2																											-6.82
	7.58																											-6.82
	0																												0
	0.38																												-0.37
	1.9																												-0.37
	2.66																												0.38
	2.28																												0.76
	1.9																												0
	1.14																												0
	0.76																												0.38
	0.38																												0.76
	-0.37																												0.76
	-0.75																												0.76
	0																												1.14
	0																													0
	0																													0
	0																													0
	0.37																													-0.38
	0.75																													-0.76
	0.75																													-0.76
	0.75																													-1.14
	0.75																													-1.52
	0.75																													-1.52
	0.75																													-1.89
	0.37																													-2.27
	0																													-2.27
	0																													-2.27
	0																													-2.27
	0																														0
	0																														0
	0																														-0.37
	0																														-0.75
	0																														-1.13
	-0.38																														-1.89
	-0.38																														-2.27
	-0.38																														-2.65
	-0.38																														-2.65
	-0.38																														-3.03
	-0.76																														-3.78
	-0.38																														-3.78
	0																														-3.78
	-0.38																														-4.16
	-1.14																														-4.54
	-1.51																														-4.54
	-1.14																														-4.16
	-0.38																														-3.4
	0																														-3.03
	0																														-3.03
	0																														-3.03
	0																														-3.03
	-0.38																														-3.03
	-0.38																														-2.65
	-0.38																														-2.65
	-0.76																														-3.03
	-1.14																														-3.4
	-1.51																														-3.78
	-1.51																														-3.78
	-1.51																														-3.78
	-1.89																														-4.16
	0																															0
	-0.38																															0
	-0.76																															-0.38
	-0.76																															-0.76
	-0.76																															-1.13
	-0.38																															-1.51
	-0.38																															-1.89
	-0.76																															-2.65
	-0.76																															-2.65
	-0.38																															-2.27
	0																															0
	-0.38																															1.52
	-0.38																															-0.38
	0.38																															-1.89
	0.76																															-0.76
	0																															2.27
	-0.38																															3.79
	0																															3.03
	0																															1.9
	0																															1.52
	0																															1.52
	0																															1.52
	-0.38																															1.9
	-0.76																															2.27
	-0.76																															1.9
	-0.76																															1.14
	-0.76																															0.76
	-1.14																															0.38
	-1.89																															0
	-2.27																															-0.38
	-2.27																															-1.13
	0																																0
	-1.14																																-0.76
	-2.65																																-1.14
	-3.41																																-1.14
	-3.79																																-1.52
	-4.55																																-2.28
	-4.17																																-2.28
	-3.03																																-1.9
	-2.65																																-1.9
	-3.03																																-1.9
	-3.41																																-1.9
	-3.03																																-1.9
	-2.65																																-1.9
	-3.79																																-2.65
	-6.06																																-4.17
	-7.58																																-4.93
	-8.71																																-5.31
	-10.99																																-6.06
	-12.88																																-6.44
	-13.64																																-6.44
	-15.15																																-6.82
	-18.56																																-6.06
	-19.7																																-6.06
	-18.18																																-6.82
	-16.29																																-5.31
	-13.64																																-3.79
	-9.47																																-4.93
	-6.44																																-6.82
	-6.44																																-7.2
	-4.55																																-4.93
	-0.76																																-1.14
	0																																	0
	0.38																																	0.38
	-0.38																																	-0.37
	-1.51																																	-1.89
	-1.51																																	-2.65
	-0.75																																	-3.4
	-0.75																																	-3.78
	-1.51																																	-3.4
	-1.51																																	-4.16
	0																																		0
	-0.38																																		1.13
	-1.9																																		4.16
	-3.03																																		7.95
	-3.79																																		10.6
	-4.93																																		12.5
	-6.44																																		13.25
	-7.58																																		13.63
	-6.82																																		13.25
	-6.06																																		12.87
	-5.68																																		12.87
	-4.93																																		12.87
	-4.55																																		12.87
	-4.55																																		12.87
	-4.93																																		12.87
	-5.68																																		12.87
	-7.58																																		12.87
	-10.99																																		13.25
	-14.4																																		14.01
	-15.53																																		14.77
	-14.77																																		15.15
	-14.4																																		15.15
	-14.02																																		15.15
	-13.64																																		15.53
	-13.26																																		16.66
	-12.5																																		17.8
	-12.5																																		18.94
	-13.26																																		20.07
	-13.64																																		20.83
	-14.02																																		21.21
	-14.77																																		21.59
	0																																			0
	-1.9																																			-1.51
	-2.28																																			-4.16
	-2.28																																			-6.06
	-1.9																																			-7.19
	-0.38																																			-9.47
	1.13																																			-12.5
	1.89																																			-13.63
	0																																				0
	0.38																																				-0.75
	0.38																																				-0.75
	0																																				0
	-0.76																																				0
	-1.14																																				0
	-1.14																																				0
	-0.38																																				1.14
	0.38																																				2.65
	0.38																																				2.65
	0																																					0
	-0.75																																					-2.27
	-1.13																																					-3.4
	-1.13																																					-3.4
	-1.13																																					-2.27
	-1.13																																					-1.51
	-1.13																																					-2.65
	-1.13																																					-3.03
	-0.75																																					-1.51
	0.38																																					0.38
	1.14																																					1.9
	1.14																																					2.28
	2.28																																					2.66
	4.17																																					3.79
	5.69																																					4.55
	6.44																																					4.55
	7.58																																					4.55
	8.72																																					4.55
	8.72																																					4.93
	8.72																																					4.93
	8.72																																					4.93
	8.72																																					6.06
	8.72																																					7.2
	8.72																																					8.34
	8.72																																					9.85
	8.72																																					11.37
	9.09																																					13.26
	8.72																																					15.16
	0																																						0
	0																																						-0.76
	0																																						-1.14
	0																																						-1.52
	0																																						-1.9
	0.38																																						-2.66
	0.38																																						-3.79
	0																																						-5.31
	0																																						-6.06
	0																																						-5.31
	0																																						-4.93
	0																																						-4.93
	0																																						-5.31
	0.38																																						-6.82
	1.13																																						-8.34
	1.13																																						-8.34
	0.76																																						-7.58
	0.38																																						-6.44
	0.38																																						-5.69
	0.76																																						-5.69
	0.76																																						-5.31
	0.76																																						-4.55
	0.76																																						-4.17
	0.76																																						-3.41
	0.76																																						-2.66
	0.38																																						-2.28
	0																																						-1.9
	0.38																																						-2.28
	0.76																																						-2.66
	1.13																																						-3.03
	1.51																																						-3.41
	0																																							0
	-0.76																																							-1.51
	-1.14																																							-2.65
	-2.28																																							-2.65
	-3.41																																							-2.27
	-4.17																																							-1.89
	-4.55																																							-1.14
	-5.31																																							0.38
	-6.06																																							1.52
	-6.06																																							1.9
	-6.06																																							1.9
	-6.82																																							1.9
	-7.2																																							2.27
	-7.58																																							1.52
	-8.72																																							1.14
	-9.09																																							1.52
	-9.09																																							2.27
	-8.72																																							3.79
	-8.34																																							6.06
	-7.96																																							9.09
	-7.96																																							9.47
	-8.34																																							8.33
	-8.34																																							8.33
	-7.96																																							8.33
	-7.58																																							8.33
	-7.58																																							8.33
	-7.58																																							8.71
	-7.2																																							8.71
	-6.82																																							8.33
	-7.58																																							8.33
	-7.96																																							8.33
	0																																								0
	0.38																																								-2.65
	0.76																																								-4.92
	0.76																																								-5.68
	0.76																																								-5.68
	1.14																																								-5.68
	0.38																																								-5.3
	-1.13																																								-4.16
	-3.78																																								-1.51
	-6.06																																								0.76
	-6.06																																								0.76
	-6.44																																								0.76
	-8.71																																								0.76
	-10.6																																								0
	-11.36																																								-0.76
	-12.5																																								-2.27
	-14.01																																								-3.79
	-15.91																																								-4.54
	-16.66																																								-4.16
	-16.66																																								-4.92
	-16.66																																								-6.06
	-16.66																																								-7.57
	-15.53																																								-10.6
	-12.12																																								-11.74
	-9.09																																								-12.12
	-7.57																																								-14.01
	-6.44																																								-15.91
	-6.81																																								-18.56
	-7.19																																								-22.35
	0																																									0
	0.76																																									-0.38
	1.14																																									-2.28
	0.38																																									-4.93
	0.76																																									-6.82
	3.41																																									-8.34
	3.03																																									-10.61
	2.27																																									-12.88
	3.03																																									-14.4
	0																																										0
	0.75																																										0.38
	0.37																																										0.76
	-1.14																																										0.76
	-3.41																																										0
	-4.93																																										-0.76
	-4.55																																										-0.76
	-3.79																																										-0.76
	-3.03																																										-1.14
	-3.03																																										-1.14
	-3.03																																										-0.76
	-2.66																																										-1.14
	-3.41																																										-1.52
	-4.93																																										-1.9
	-1.9																																										-4.17
	-0.38																																										-4.17
	-2.66																																										-2.65
	-2.28																																										-3.03
	-2.28																																										-2.65
	0.37																																										-4.55
	4.54																																										-8.33
	6.81																																										-10.61
	8.33																																										-11.36
	8.33																																										-11.36
	5.68																																										-10.23
	2.65																																										-8.71
	2.27																																										-7.96
	0																																											0
	-1.13																																											3.41
	-1.51																																											6.44
	-2.65																																											8.71
	-3.03																																											9.85
	-2.65																																											9.47
	-4.16																																											9.09
	0																																												0
	0																																												-0.38
	0.38																																												-0.38
	0.76																																												0
	0.38																																												-0.38
	0																																												-1.14
	-0.38																																												-1.52
	-0.38																																												-1.14
	0																																												-0.76
	-0.38																																												-0.76
	-0.38																																												-0.76
	-0.38																																												-1.52
	-0.76																																												-2.28
	-0.76																																												-2.28
	-0.38																																												-1.9
	0																																												-1.9
	0																																												-2.28
	0.38																																												-2.28
	0.38																																												-2.65
	0																																												-3.03
	0																																												-3.03
	-0.76																																												-2.65
	-1.13																																												-2.28
	-0.38																																												-2.28
	-0.38																																												-2.28
	-1.89																																												-2.28
	0																																													0
	0																																													0.38
	-0.37																																													1.14
	0.76																																													2.27
	2.66																																													2.65
	4.55																																													3.03
	6.44																																													3.03
	7.96																																													2.27
	9.47																																													1.52
	11.37																																													0.76
	12.88																																													0.76
	15.53																																													1.9
	18.56																																													3.03
	19.32																																													3.79
	19.32																																													6.82
	19.7																																													8.71
	19.7																																													10.61
	0																																														0
	-0.75																																														-2.27
	-0.38																																														-3.41
	0.76																																														-3.79
	2.28																																														-4.54
	4.93																																														-4.54
	0																																															0
	2.65																																															-3.03
	7.58																																															-5.68
	10.61																																															-7.2
	9.47																																															-9.09
	9.47																																															-10.61
	10.61																																															-10.61
	10.61																																															-11.37
	9.09																																															-12.12
	7.96																																															-11.74
	5.68																																															-12.88
	0																																																0
	-3.78																																																0
	-6.06																																																0
	-4.92																																																0
	-3.4																																																0
	-2.65																																																0
	-5.3																																																0
	-8.33																																																0
	-7.95																																																0
	-6.43																																																0
	-7.19																																																0
	-8.33																																																0
	-9.09																																																0
	-10.98																																																0
	-12.12																																																0
	-12.5																																																0
	-13.25																																																0
	-13.63																																																0
	0
	0
	0
	0
	0.38
	0.38
	0
	-0.38
	-1.14
	-1.52
	-1.14
	-0.76
	-0.76
	-0.38
	1.13
	2.27
	2.27
	1.89
	1.89
	2.27
	2.27
	2.27
	0
	0.38
	0.38
	0.38
	0.38
	0
	-1.14
	-1.52
	-0.76
	1.13
	2.27
	1.89
	1.51
	1.51
	1.51
	0.38
	-0.76
	-0.76
	-0.38
	0
	0.38
	0.38
	0
	-2.65
	-5.3
	-7.2
	-8.33
	-9.09
	-9.47
	-9.47
	-9.47
	-9.09
	-7.95
	-6.44
	-4.17
	-2.65
	-2.65
	-3.41
	-4.17
	-4.17
	-3.79
	-3.41
	0
	0.76
	1.52
	1.9
	1.9
	0.76
	-0.37
	-0.37
	-0.37
	-0.37
	0
	0.76
	0.38
	-0.37
	-0.75
	-0.75
	-0.75
	-1.13
	-1.51
	-2.27
	-2.65
	0
	-0.75
	-0.75
	-0.75
	-0.75
	-0.37
	0
	-4.17
	-0.38
	3.78
	3.78
	3.78
	3.78
	0
	0.76
	1.14
	1.14
	1.14
	1.14
	1.9
	3.41
	4.55
	4.93
	4.55
	4.17
	3.79
	3.03
	2.66
	2.66
	3.79
	5.69
	7.2
	0
	0
	0
	0
	0
	0
	0
	0
	0
	0
	0
	0
	0
	0
	0
	-0.38
	0
	-0.75
	-0.75
	-0.37
	-2.65
	-6.06
	-6.81
	-7.19
	-7.57
	-8.33
	0
	0
	0
	0
	0
	0
	0
	0
	0
	0.38
	0.76
	0.76
	0.76
	0.76
	0
	-1.51
	-2.65
	-2.27
	-3.03
	0
	0.38
	0.76
	1.14
	2.66
	4.17
	5.31
	8.34
	10.23
	9.47
	7.96
	6.44
	6.07
	6.82
	7.58
	0
	-0.38
	-0.75
	-0.75
	-0.75
	-1.13
	-1.51
	-1.51
	-1.51
	-1.51
	-1.51
	-1.51
	-1.51
	-1.51
	0
	-2.27
	-3.79
	-5.68
	-10.23
	-9.85
	-6.06
	-6.06
	-9.09
	-11.74
	-15.15
	0
	0.76
	3.03
	4.17
	4.17
	3.79
	3.41
	3.41
	3.41
	3.79
	4.17
	4.17
	4.17
	4.17
	0
	-0.75
	-0.75
	-0.37
	-2.65
	-6.06
	-6.81
	-7.19
	-7.57
	-8.33
	0
	0
	0
	0
	0
	0
	0
	0
	0
	0.38
	0.76
	0.76
	0.76
	0.76
	0
	0.38
	0.38
	0.38
	0.38
	0
	-1.14
	-1.52
	-0.76
	1.13
	2.27
	1.89
	1.51
	1.51
	1.51
	0.38
	-0.76
	-0.76
	-0.38
	0
	0.38
	0.38
	0
	-2.65
	-5.3
	-7.2
	-8.33
	-9.09
	-9.47
	-9.47
	-9.47
	-9.09
	-7.95
	-6.44
	-4.17
	-2.65
	-2.65
	-3.41
	-4.17
	-4.17
	-3.79
	-3.41
	0
	0.76
	1.52
	1.9
	1.9
	0.76
	-0.37
	-0.37
	-0.37
	-0.37
	0
	0.76
	0.38
	-0.37
	-0.75
	-0.75
	-0.75
	-1.13
	-1.51
	-2.27
	-2.65
	0
	-0.76
	-1.52
	-1.9
	-0.76
	0
	-3.03
	-10.23
	-13.64
	-13.26
	-15.16
	-16.67
	-17.81
	0
	-3.41
	-6.82
	-10.6
	-13.26
	-14.77
	-14.77
	-14.01
	-12.88
	-11.74
	-11.36
	0
	-0.76
	-2.65
	-4.92
	-5.68
	-4.92
	-3.79
	-2.27
	-1.13
	-1.51
	-2.65
	0
	-0.38
	-0.38
	-0.76
	-1.14
	-1.52
	-2.27
	-2.65
	-3.03
	-3.79
	0
	0.38
	0.76
	1.14
	2.66
	4.17
	5.31
	8.34
	10.23
	9.47
	7.96
	6.44
	6.07
	6.82
	7.58
	0
	0.75
	0.37
	-1.14
	-3.41
	-4.93
	-4.55
	-3.79
	-3.03
	-3.03
	-3.03
	-2.66
	-3.41
	-4.93
	-1.9
	-0.38
	-2.66
	-2.28
	-2.28
	0.37
	4.54
	6.81
	8.33
	8.33
	5.68
	2.65
	2.27
[truncated: 26 more columns]
