# Supplementary material for: CD31 signaling promotes the detachment at the uropod of extravasating neutrophils allowing their migration to sites of inflammation
Source: eLife. 2023 Aug 7;12:e84752. doi: 10.7554/eLife.84752 (PMC10431918; doi:10.7554/eLife.84752)
Supplement: Figure 4—source data 5. [file elife-84752-fig4-data5.xlsx]

## Sheet: Figure 4H (righ)
	Track plots of Lyz2-GFP+ cells at 3 hours after IL-1b injection treated with CD31agonist
	Distance (µm)	Path ID
		1	2	3	4	5	6	7	8	9	10	11	12	13	14	15	16	17	18	19	20	21	22	23	24	25	26	27	28	29	30	31	32	33	34	35	36	37	38	39	40	41	42	43	44	45	46	47	48
	0	0
	2.92	4.02
	5.12	9.88
	5.49	12.81
	6.22	14.27
	0		0
	-1.1		0
	-1.83		0
	-2.92		2.2
	-4.39		2.2
	-5.49		0
	-8.41		3.66
	-11.71		8.05
	-13.53		9.51
	-13.9		9.88
	-12.44		8.78
	-12.07		8.42
	-15.73		9.88
	-19.02		11.71
	-19.75		12.81
	-21.58		13.17
	-23.05		13.9
	-20.12		13.9
	-17.92		13.54
	-19.02		13.9
	-18.29		13.54
	-17.19		13.17
	-17.92		13.54
	-19.39		13.9
	-20.49		13.9
	-21.22		14.27
	-20.85		14.63
	-20.85		14.63
	-19.75		13.9
	-17.92		12.81
	-19.02		13.17
	0			0
	-1.83			-3.66
	-3.3			-5.85
	-6.59			-5.12
	-12.81			-2.92
	-16.83			-1.09
	-19.39			0.37
	-20.49			1.47
	-20.12			0.74
	-20.49			0.74
	-20.12			0.37
	-20.49			-1.09
	-21.95			-1.09
	-22.32			-0.73
	-23.42			-0.36
	-24.51			-0.73
	-25.61			-0.36
	0				0
	-2.93				-2.93
	-6.58				-7.69
	-8.05				-9.88
	-5.12				-10.98
	-2.93				-12.44
	-2.19				-16.83
	2.2				-19.03
	2.56				-17.57
	0				-17.57
	1.1				-18.3
	0					0
	-0.73					-0.37
	-2.2					-1.83
	-7.32					-4.39
	0						0
	-2.56						-1.1
	-5.49						-2.56
	-9.88						-4.39
	-13.9						-6.59
	-15						-8.78
	-14.27						-10.61
	-13.17						-11.71
	-12.44						-11.71
	-11.71						-10.25
	-11.71						-9.88
	-13.17						-10.61
	-14.27						-10.98
	0							0
	-4.03							0.36
	-6.59							0.73
	0								0
	3.66								-3.29
	7.32								-5.12
	9.15								-6.22
	12.08								-10.24
	16.47								-15
	21.59								-17.19
	25.61								-17.92
	30.73								-20.49
	35.86								-22.31
	37.69								-21.58
	40.61								-21.58
	45								-21.22
	47.56								-19.39
	49.76								-16.1
	52.69								-13.9
	57.44								-13.9
	64.39								-12.07
	0									0
	-4.76									-1.47
	-7.32									-2.56
	-9.88									-5.13
	-13.17									-6.95
	-14.27									-6.59
	-15									-6.22
	-16.47									-6.22
	-17.93									-7.32
	-19.39									-8.05
	-20.12									-8.05
	-21.22									-5.86
	-23.05									-2.56
	-24.15									-1.47
	-24.15									-1.83
	-24.15									-2.93
	-25.25									-3.66
	-26.34									-3.66
	-26.34									-2.2
	-24.88									0
	-24.15									0.73
	-24.88									0.73
	-24.51									0.73
	-23.78									0.73
	-22.32									0.36
	-20.49									-0.37
	-19.76									-1.1
	-19.76									-1.1
	-20.49									-0.37
	0										0
	-3.3										-0.37
	-8.78										-0.37
	-12.81										-2.93
	-13.54										-6.59
	-10.25										-9.15
	-7.69										-10.61
	-9.15										-10.24
	-14.64										-8.78
	-19.03										-8.05
	-19.76										-8.05
	-19.39										-8.41
	-18.3										-9.88
	-16.47										-13.17
	-16.83										-13.17
	-19.03										-9.88
	-19.76										-8.41
	-20.12										-8.05
	-21.59										-7.68
	-23.42										-6.95
	-24.51										-6.59
	-25.61										-6.59
	-26.34										-6.59
	-25.98										-6.95
	-25.61										-7.68
	-25.61										-7.68
	-23.42										-8.05
	-20.49										-9.15
	-20.12										-9.51
	-19.76										-9.88
	-19.76										-10.24
	0											0
	0.36											-2.93
	1.83											-7.32
	4.39											-12.08
	6.95											-15
	8.78											-15
	10.24											-14.64
	11.7											-15
	13.17											-15
	14.26											-14.27
	14.63											-13.54
	13.53											-12.08
	12.8											-9.52
	12.8											-9.15
	12.44											-10.98
	12.8											-12.81
	13.17											-13.54
	12.8											-12.81
	12.8											-12.81
	12.8											-13.54
	12.44											-13.91
	12.8											-13.91
	13.9											-14.27
	14.26											-15.37
	13.53											-16.83
	13.53											-17.57
	13.53											-17.2
	13.17											-16.47
	13.53											-16.1
	13.9											-16.1
	14.26											-16.1
	0												0
	1.46												4.02
	2.2												6.58
	1.46												5.49
	0.37												3.29
	-1.46												2.56
	-3.66												4.39
	-5.12												5.85
	-5.49												6.22
	-6.95												6.22
	-12.44												6.58
	-17.93												5.85
	0													0
	-2.19													0
	-5.12													0
	-9.51													-0.36
	-12.8													-0.36
	-14.27													-0.36
	-16.1													-1.1
	-17.93													-0.73
	-18.29													0.73
	0														0
	-1.83														-1.1
	-4.76														-2.2
	-8.05														-3.66
	-10.98														-5.12
	-11.71														-6.59
	-11.71														-8.42
	-12.07														-9.88
	-11.71														-9.88
	-11.71														-9.88
	-13.9														-11.34
	-16.1														-13.17
	0															0
	-2.56															2.56
	-1.47															1.46
	0.36															-0.73
	1.46															-1.83
	4.39															-4.76
	6.22															-7.68
	5.85															-8.78
	4.02															-8.42
	1.83															-7.68
	1.46															-8.05
	2.56															-9.51
	0																0
	4.03																-3.65
	7.32																-6.58
	7.32																-9.14
	6.95																-10.97
	8.42																-11.34
	10.61																-11.7
	12.44																-13.17
	13.9																-15.36
	15.73																-17.56
	16.83																-16.09
	16.83																-14.63
	17.2																-16.09
	17.56																-16.83
	17.93																-16.83
	17.93																-17.19
	17.93																-18.29
	0																	0
	-2.19																	-4.39
	-3.29																	-7.68
	-4.02																	-9.51
	-5.12																	-10.97
	-5.85																	-12.07
	-6.22																	-13.17
	-6.22																	-13.17
	-6.22																	-13.53
	-5.12																	-11.71
	-4.75																	-9.14
	-5.49																	-10.61
	-5.49																	-12.44
	-5.85																	-13.17
	-5.85																	-12.8
	-5.12																	-12.07
	-4.02																	-12.8
	-3.66																	-13.17
	-5.12																	-13.17
	-6.58																	-12.8
	-7.32																	-12.44
	-7.32																	-11.71
	-6.58																	-10.24
	-6.22																	-9.51
	-6.22																	-9.14
	-6.22																	-9.51
	-6.22																	-10.24
	-6.22																	-10.24
	-6.58																	-9.88
	-6.95																	-10.24
	-6.95																	-10.61
	0																		0
	2.92																		-4.02
	5.49																		-7.32
	0																			0
	-2.19																			-0.73
	-5.48																			-1.46
	0																				0
	1.1																				-3.29
	0.36																				-6.58
	-0.37																				-8.78
	-0.37																				-10.61
	-1.47																				-12.8
	-4.39																				-14.26
	-8.05																				-15
	-10.25																				-16.09
	-10.61																				-17.56
	-10.98																				-19.02
	-12.08																				-19.75
	-12.81																				-20.48
	-14.27																				-19.75
	-16.1																				-16.09
	-17.2																				-13.53
	-17.2																				-13.17
	-17.93																				-11.34
	-21.22																				-9.51
	-23.05																				-9.51
	-22.68																				-8.78
	0																					0
	0.37																					-5.13
	1.1																					-9.15
	1.1																					-9.88
	0.73																					-9.88
	0.73																					-8.42
	-0.36																					-7.69
	-0.36																					-6.96
	0.73																					-5.86
	0.37																					-6.59
	0																					-6.22
	-0.36																					-6.22
	-0.73																					-8.42
	-0.36																					-8.78
	-0.36																					-8.42
	-1.83																					-8.78
	-3.29																					-8.05
	-5.49																					-10.61
	-8.05																					-14.64
	-8.78																					-17.57
	0																						0
	0																						2.19
	0.37																						3.65
	0.74																						2.19
	-0.36																						-1.47
	-2.56																						-3.66
	-5.85																						-5.49
	-9.87																						-8.05
	-13.53																						-9.88
	-16.83																						-11.71
	-19.02																						-12.81
	-20.85																						-13.91
	-22.31																						-15
	-22.68																						-15
	-23.05																						-15
	-24.14																						-16.47
	-24.51																						-16.83
	-23.41																						-14.27
	-24.14																						-13.54
	-27.07																						-15
	-29.26																						-16.1
	-30																						-16.47
	-30																						-16.47
	-29.63																						-16.47
	-29.63																						-16.47
	-30.73																						-16.83
	-31.46																						-17.2
	-30.73																						-16.47
	-30.73																						-16.1
	-31.83																						-16.47
	-32.19																						-16.83
	0																							0
	-0.73																							-1.46
	-1.1																							-5.12
	-0.36																							-8.41
	0.73																							-11.71
	1.83																							-15.36
	0																								0
	0																								0
	-0.74																								-2.56
	-1.47																								-6.22
	-1.83																								-8.41
	-1.83																								-12.44
	-2.2																								-16.1
	-2.93																								-16.46
	-3.3																								-16.83
	-4.03																								-17.56
	-5.49																								-17.93
	-6.22																								-18.29
	-6.59																								-17.93
	-6.95																								-18.29
	0																									0
	0.36																									1.46
	0.36																									2.93
	-0.37																									2.19
	-0.74																									2.56
	2.19																									5.49
	5.48																									6.95
	6.22																									6.95
	6.22																									6.58
	0																										0
	0.73																										1.1
	4.75																										5.13
	8.41																										8.42
	9.51																										8.78
	10.24																										9.15
	10.24																										9.15
	9.88																										8.78
	9.51																										8.78
	8.78																										8.42
	7.31																										7.69
	6.58																										7.32
	6.58																										6.96
	6.58																										6.59
	6.22																										6.59
	6.22																										6.22
	6.58																										6.22
	0																											0
	1.46																											-1.47
	2.56																											-3.3
	4.76																											-7.69
	6.59																											-11.71
	7.32																											-13.17
	0																												0
	-0.37																												-0.74
	0.73																												-0.74
	2.19																												-1.1
	2.19																												-1.47
	1.46																												-0.74
	4.02																												0.36
	7.32																												0.73
	7.68																												-1.1
	8.05																												-4.76
	8.05																												-9.15
	7.32																												-15.37
	7.32																												-19.03
	0																													0
	1.1																													1.83
	3.29																													4.39
	5.49																													7.32
	8.41																													12.07
	11.34																													15.73
	12.07																													16.46
	12.8																													16.1
	12.44																													12.81
	16.1																													12.44
	19.76																													15
	20.12																													16.46
	22.68																													17.2
	24.88																													14.27
	26.34																													10.25
	26.34																													7.32
	25.24																													5.49
	23.05																													1.47
	20.12																													-4.75
	18.29																													-8.78
	0																														0
	-0.36																														1.83
	-1.83																														4.03
	-2.92																														5.49
	-5.12																														6.59
	-7.32																														6.22
	-9.51																														2.2
	-10.61																														1.83
	-8.05																														8.05
	-6.95																														9.15
	-8.05																														6.22
	-8.41																														6.59
	0																															0
	-5.13																															1.1
	-7.69																															3.29
	-9.88																															6.95
	-12.44																															9.88
	-15.74																															13.9
	0																																0
	0.73																																-1.83
	1.83																																-2.92
	1.1																																-4.39
	-2.92																																-8.05
	-6.95																																-10.97
	-7.31																																-10.97
	-6.22																																-10.61
	-5.48																																-9.87
	-5.12																																-9.87
	0																																	0
	2.56																																	1.09
	4.39																																	2.19
	4.39																																	3.65
	4.02																																	5.12
	4.02																																	5.85
	4.39																																	6.21
	4.02																																	6.21
	1.46																																	6.95
	0																																	7.68
	0.73																																	6.58
	2.19																																	5.12
	4.02																																	5.48
	4.75																																	5.85
	3.66																																	5.48
	4.39																																	6.58
	8.41																																	7.68
	10.24																																	8.04
	7.68																																	7.68
	5.85																																	7.68
	5.85																																	7.68
	4.39																																	6.95
	2.19																																	6.21
	2.56																																	6.21
	4.39																																	6.95
	4.75																																	6.58
	0																																		0
	-0.36																																		-4.39
	0																																			0
	-2.56																																			2.19
	-4.39																																			5.48
	-5.12																																			7.31
	-5.86																																			8.78
	-6.22																																			9.51
	-6.22																																			9.51
	-6.59																																			8.41
	-5.86																																			5.48
	-7.32																																			1.46
	-10.25																																			0.36
	-11.71																																			0.73
	0																																				0
	-1.46																																				-1.46
	-2.19																																				-2.19
	-2.92																																				-3.29
	-2.92																																				-6.58
	-4.02																																				-11.71
	-6.22																																				-14.63
	-5.12																																				-15.36
	0																																					0
	1.47																																					2.56
	2.56																																					5.86
	2.56																																					7.32
	4.03																																					9.51
	5.49																																					12.44
	3.66																																					17.2
	1.47																																					20.12
	0.74																																					19.39
	0.37																																					16.83
	-2.19																																					10.98
	-4.02																																					9.51
	-4.39																																					12.81
	-5.48																																					13.9
	-5.48																																					13.9
	-5.85																																					13.9
	0																																						0
	0																																						0
	0																																						0
	0																																						0
	-3.66																																						1.83
	-8.05																																						4.02
	-9.14																																						4.75
	-9.14																																						5.12
	-9.51																																						5.12
	-10.61																																						5.48
	-11.34																																						6.22
	-12.07																																						5.85
	-12.8																																						5.48
	-13.53																																						5.48
	-14.27																																						4.75
	-14.63																																						3.29
	-14.63																																						1.09
	-15.36																																						-1.47
	-17.19																																						-5.13
	-17.56																																						-6.59
	-16.83																																						-6.22
	-16.46																																						-6.96
	-16.1																																						-6.96
	-16.46																																						-6.96
	-16.83																																						-7.69
	-16.46																																						-7.32
	-16.1																																						-6.59
	-15.73																																						-6.96
	-15.36																																						-6.96
	-15.36																																						-6.96
	-15.73																																						-7.32
	0																																							0
	0.74																																							2.93
	1.1																																							7.32
	2.2																																							11.34
	2.93																																							13.54
	2.93																																							14.27
	3.66																																							13.9
	4.39																																							14.63
	4.39																																							15
	4.03																																							12.8
	2.57																																							12.44
	1.83																																							13.17
	2.57																																							12.8
	2.2																																							13.9
	1.47																																							14.63
	0.74																																							13.17
	-0.36																																							10.24
	-2.19																																							8.05
	-4.39																																							6.95
	-6.58																																							5.49
	-8.78																																							4.39
	-10.24																																							4.02
	-10.61																																							2.56
	-10.97																																							1.46
	-11.34																																							1.1
	-10.61																																							0
	-11.7																																							-0.37
	0																																								0
	3.66																																								0.37
	6.59																																								0
	8.05																																								0.37
	8.78																																								1.83
	9.15																																								4.39
	9.51																																								6.59
	10.98																																								8.05
	0																																									0
	-0.73																																									-2.19
	-1.83																																									-5.12
	-2.93																																									-7.31
	-4.76																																									-8.41
	-6.22																																									-8.41
	-6.59																																									-7.31
	-3.66																																									-6.95
	0.36																																									-4.02
	2.19																																									-1.09
	3.66																																									-5.85
	3.29																																									-12.07
	-0.73																																									-13.9
	-5.49																																									-14.63
	-8.42																																									-15.36
	-10.61																																									-11.7
	-11.71																																									-5.48
	-10.98																																									0.74
	-11.34																																									5.86
	-13.54																																									7.32
	-13.91																																									4.76
	-12.81																																									1.83
	-11.71																																									-1.46
	-10.25																																									-5.12
	-8.78																																									-6.95
	-6.59																																									-9.87
	-2.2																																									-13.17
	2.19																																									-16.46
	4.39																																									-19.02
	5.85																																									-20.12
	6.22																																									-20.85
	0																																										0
	-2.93																																										2.93
	-4.75																																										6.22
	-4.39																																										6.58
	-3.29																																										4.75
	-1.1																																										2.56
	2.56																																										-1.83
	5.85																																										-7.68
	5.49																																										-9.88
	3.66																																										-9.88
	1.46																																										-8.78
	0																																										-7.68
	-2.19																																										-5.12
	-4.75																																										-2.2
	-4.39																																										-3.29
	-4.39																																										-3.66
	-2.19																																										-4.76
	2.56																																										-7.68
	5.12																																										-9.51
	5.12																																										-10.61
	5.49																																										-11.34
	6.59																																										-14.27
	5.85																																										-18.29
	3.66																																										-21.22
	1.83																																										-22.68
	-0.36																																										-20.86
	-4.02																																										-17.93
	-5.49																																										-16.83
	-5.49																																										-16.46
	-5.85																																										-16.46
	0																																											0
	2.93																																											0.73
	8.78																																											0.73
	10.98																																											0
	11.34																																											-0.74
	12.44																																											-2.93
	13.54																																											-4.39
	0																																												0
	0.37																																												0
	0.74																																												0.73
	1.47																																												0
	1.47																																												-1.1
	1.47																																												-1.83
	-1.46																																												-0.37
	-4.39																																												1.46
	-5.12																																												1.46
	-8.04																																												2.56
	-10.61																																												2.19
	-11.34																																												0
	0																																													0
	-0.73																																													-1.82
	-1.46																																													-4.39
	-1.82																																													-4.39
	-2.56																																													-5.12
	-1.82																																													-6.95
	-1.46																																													-8.41
	-1.46																																													-8.78
	1.1																																													-11.34
	2.57																																													-15.36
	0.37																																													-19.02
	-2.56																																													-22.68
	-3.65																																													-24.14
	-4.02																																													-23.78
	-4.75																																													-24.51
	-5.12																																													-26.7
	-6.21																																													-28.9
	-6.95																																													-30.73
	-5.85																																													-30.73
	-2.92																																													-31.09
	0.74																																													-34.39
	3.3																																													-39.14
	5.13																																													-43.17
	6.96																																													-45.73
	8.79																																													-47.92
	10.25																																													-50.12
	11.35																																													-51.21
	11.71																																													-51.58
	12.08																																													-53.04
	0																																														0
	-1.1																																														1.1
	-1.1																																														0.73
	0																																														-1.46
	3.29																																														-6.58
	8.41																																														-13.53
	11.34																																														-18.29
	11.71																																														-20.48
	11.34																																														-21.58
	10.61																																														-23.05
	10.24																																														-24.14
	11.34																																														-22.31
	12.07																																														-19.02
	8.41																																														-15.73
	4.76																																														-15
	3.66																																														-16.46
	2.56																																														-18.29
	0																																															0
	-2.93																																															6.95
	-5.13																																															12.07
	-7.32																																															13.17
	-9.52																																															11.34
	-11.71																																															5.85
	-14.27																																															-1.1
	-15.37																																															-7.32
	-15.37																																															-14.27
	-16.83																																															-19.75
	-19.03																																															-23.78
	0																																																0
	0.36																																																5.12
	1.09																																																8.41
	1.46																																																10.97
	1.09																																																13.53
	0
	2.19
	5.12
	5.49
	6.59
	8.78
	10.98
	10.98
	9.51
	7.32
	0
	-1.09
	-2.92
	-4.39
	-6.22
	-8.04
	-9.51
	-9.51
	-7.68
	-6.95
	-9.51
	-10.97
	-10.24
	-12.07
	-14.26
	-13.9
	-12.8
	-13.17
	-13.53
	-12.8
	-13.17
	0
	-0.73
	-1.46
	-1.46
	-3.29
	-5.12
	-5.49
	0
	-0.36
	-2.56
	-4.02
	-5.49
	-6.22
	-5.49
	-4.39
	-4.39
	0
	0.73
	0
	-1.46
	-6.59
	-12.07
	-13.54
	-15
	-17.56
	-21.22
	-24.51
	-28.17
	-31.46
	-32.93
	-33.66
	-32.93
	-31.83
	-31.1
	-30.37
	0
	-1.83
	-3.29
	-3.65
	-4.39
	-6.22
	-7.68
	-8.04
	0
	2.92
	3.66
	3.66
	4.75
	5.85
	5.49
	6.95
	10.61
	12.07
	11.34
	13.17
	13.9
	12.8
	15
	18.29
	18.29
	0
	1.46
	3.66
	5.48
	6.95
	8.05
	9.14
	8.78
	8.05
	7.68
	6.95
	6.58
	6.58
	6.95
	6.58
	7.31
	10.61
	12.44
	10.97
	9.14
	5.48
	1.46
	0
	-0.37
	4.39
	9.87
	9.87
	8.78
	0
	158.04
	156.21
	152.92
	152.92
	156.58
	0
	-1.1
	-5.12
	-9.88
	-12.07
	-12.8
	-13.9
	-14.63
	-15.36
	0
	0
	0.74
	0.74
	0.74
	0.37
	0
	0
	-0.36
	-0.73
	-1.09
	-1.46
	-1.46
	-0.36
	0.74
	0.37
	0.37
	0.37
	-1.09
	-3.65
	-5.85
	-6.95
	-7.31
	-6.58
	-5.85
	-6.22
	-6.22
	0
	3.66
	4.02
	4.39
	1.83
	1.46
	3.66
	7.31
	11.34
	10.61
	10.24
	9.51
	7.68
	7.68
	8.05
	8.05
	8.41
	9.51
	11.7
	13.17
	13.53
	13.9
	14.63
	17.19
	19.02
	19.39
	20.12
	0
	0.73
	1.1
	0.73
	0.73
	0
	-2.19
	-2.19
	2.2
	6.22
	0
	0.37
	0.37
	-0.36
	-4.39
	-6.58
	-4.39
	-6.22
	-10.24
	-12.8
	-12.07
	-9.87
	-10.24
	-10.24
	-9.87
	-8.41
	-7.31
	-7.68
	-8.78
	-10.24
	-10.97
	-9.87
	-8.04
	-8.41
	-10.24
	0
	0
	-0.74
	-1.47
	-2.93
	-3.3
	-2.2
	-2.57
	-4.03
	-4.39
	-4.03
	-4.03
	-4.03
	-4.39
	-5.13
	-5.49
	-5.13
	-4.76
	-4.76
	-4.76
	-5.13
	-5.13
	-4.76
	-4.76
	-5.49
[truncated: 15 more columns]
