# Supplementary material for: CD31 signaling promotes the detachment at the uropod of extravasating neutrophils allowing their migration to sites of inflammation
Source: eLife. 2023 Aug 7;12:e84752. doi: 10.7554/eLife.84752 (PMC10431918; doi:10.7554/eLife.84752)
Supplement: Figure 5—source data 1. [file elife-84752-fig5-data1.xlsx]

## Sheet: Figure 5C
		Absolute numbers of extravasated neutrophils at 4 hours in Wt and Pecam1-/- mice treated or not with RGD peptides
		Peritoneal neutrophils at 4 hours
		WT					Pecam1-/-
	Vehicle	1524540	1594560	726960	1072380	1128400	275520	709280	494400	1046640	331125	470550
	RGD	1481400	752850	634320	1381740		1191200	1332080	1393600	1582800	1963900
