# Supplementary material for: CD31 signaling promotes the detachment at the uropod of extravasating neutrophils allowing their migration to sites of inflammation
Source: eLife. 2023 Aug 7;12:e84752. doi: 10.7554/eLife.84752 (PMC10431918; doi:10.7554/eLife.84752)
Supplement: Figure 5—source data 2. [file elife-84752-fig5-data2.xlsx]

## Sheet: Figure 5E
		Quantification of Pecam1-/- neutrophil distance from the closest post-capillary vessels in vehicle or RGD-treated mice
		Distance from vessel (µm)
		Vehicle	RGD
		13.38	16.9
		6.69	7.62
		2.43	38.08
		3.27	10.19
		6.02	2.58
		6.56	18.05
		3.44	27.33
		5.18	67.99
		2.75	75.21
		8.71	80.2
		4.3	59.96
		3.65	112.12
		3.87	144.07
		4.63	149.2
		3.1	150.91
		3.01	147.89
		3.55	35.5
		5.25	27.18
		4.06	72.75
		3.47	6.04
		5.61	12.5
		30.5	24.69
		37.03	48.29
		4.73	69.63
		3.44	6.58
		2.58	5.74
		38.42	6.02
		6.04	3.87
		1.72	4.49
		18.31	15.49
		5.16	6.58
		4.73	10.78
		3.01	31.19
		1.29	15.96
		3.44	10.04
		3.04	17.14
		4.06	33.97
		5.79	52.06
		4.3	41.66
		5.16	49.08
		15.41	8.27
		39.03	6.02
		32.96	33.99
		32.54	49.47
		78.84	101.49
		111.6	36.98
		88.18	49.93
		70.54	53.18
		41.75	71.14
		22.3	93.48
		38.81	26.23
		4.06	50.62
		2.19	57.98
		8.35	44.07
		18.56	7.16
		23.54	69.87
		4.63	85.14
		2.72	87.24
		3.27	105.79
		3.44	111.13
		4.73	159.62
		13.01	166.23
		3.04	125.7
		2.58	128.24
		10.88	118.34
		3.44	130.29
		2.19	172.43
		4.3	155.72
		8.65	77.4
		8.6	105.37
		3.89	92.02
		1.82	123.45
		26.03	67.09
		2.58	94.6
		6.02	109.79
		21.09	125.73
		8.6	163
		14.29	150.5
		35.13
		11.86
		14.45
		2.15
