# Supplementary material for: CD31 signaling promotes the detachment at the uropod of extravasating neutrophils allowing their migration to sites of inflammation
Source: eLife. 2023 Aug 7;12:e84752. doi: 10.7554/eLife.84752 (PMC10431918; doi:10.7554/eLife.84752)
Supplement: Figure 5—source data 3. [file elife-84752-fig5-data3.xlsx]

## Sheet: Figure 5G
	Absolute numbers of extravasated neutrophils at 4 hours in the indicated conditions
	Peritoneal neutrophils at 4 hours
	PBS				IL1b+Vehicle					IL1b+P8RI (CD31 Agonist)
	790	76	123		1072380	1128400	1594560	1229400	783600	2809800	1731600	2689400	2490400
