# Supplementary material for: CD31 signaling promotes the detachment at the uropod of extravasating neutrophils allowing their migration to sites of inflammation
Source: eLife. 2023 Aug 7;12:e84752. doi: 10.7554/eLife.84752 (PMC10431918; doi:10.7554/eLife.84752)
Supplement: Figure 5—source data 4. [file elife-84752-fig5-data4.xlsx]

## Sheet: Figure 5J
	Proportion of transferred WT or Pecam1ITIM-/- neutrophils in the blood before L-1b challenge
	WT	Pecam1ITIM-/-
	50.4	49.6
	45.8	54.2
	56.3	43.7
	54.2	45.8
	52.6	47.4
	44.8	53.9
	50.4	49.6
	48.5	50.6
