# Supplementary material for: CD31 signaling promotes the detachment at the uropod of extravasating neutrophils allowing their migration to sites of inflammation
Source: eLife. 2023 Aug 7;12:e84752. doi: 10.7554/eLife.84752 (PMC10431918; doi:10.7554/eLife.84752)
Supplement: Figure 5—source data 5. [file elife-84752-fig5-data5.xlsx]

## Sheet: Figure 5K
	Proportion of transferred WT or Pecam1ITIM-/- neutrophils in the blood 4 hours after IL-1b challenge
	WT	Pecam1ITIM-/-
	50.5	49.5
	49.1	50.9
	48.8	51.2
	48.4	51.2
	52.9	47.1
	52.4	47.6
	47.9	51.8
