# Supplementary material for: CD31 signaling promotes the detachment at the uropod of extravasating neutrophils allowing their migration to sites of inflammation
Source: eLife. 2023 Aug 7;12:e84752. doi: 10.7554/eLife.84752 (PMC10431918; doi:10.7554/eLife.84752)
Supplement: Figure 5—source data 6. [file elife-84752-fig5-data6.xlsx]

## Sheet: Figure 5L
	Proportion of transferred WT or Pecam1ITIM-/- neutrophils in the peritoneal fluid 4 hours after IL-1b challenge
	WT	Pecam1-/-
	52.9	47.1
	53.9	45.9
	56.2	43.8
	54.6	44.6
	53.7	46.1
	53.3	46.3
	52.4	46.9
